1 **Acoustogenetic Control of CAR T Cells via Focused Ultrasound**

2

3 Yiqian Wu<sup>1</sup>, Yahan Liu<sup>2,3</sup>, Ziliang Huang<sup>2</sup>, Xin Wang<sup>1</sup>, Zhen Jin<sup>4</sup>, Jiayi Li<sup>1</sup>, Praopim Limsakul<sup>5</sup>,

4 Linshan Zhu<sup>1</sup>, Molly Allen<sup>1</sup>, Yijia Pan<sup>1</sup>, Robert Bussell<sup>6</sup>, Aaron Jacobson<sup>6</sup>, Thomas Liu<sup>6</sup>, Shu

5 Chien<sup>1,2,\*</sup>, Yingxiao Wang<sup>1,2,\*</sup>

6

7 <sup>1</sup>Department of Bioengineering, University of California, San Diego, La Jolla, CA, USA.

8 <sup>2</sup>Institute of Engineering in Medicine, University of California, San Diego, La Jolla, CA, USA.

9 <sup>3</sup>Institute of Cardiovascular Sciences, Peking University Health Science Center, Beijing, China.

10 <sup>4</sup>Ruijin Hospital, Shanghai, China.

11 <sup>5</sup>Department of Physics, Prince of Songkla University, Songkhla, Thailand.

12 <sup>6</sup>Center for Functional MRI, University of California, San Diego, La Jolla, CA, USA.

13 \*Correspondence to: Email: [yiw015@eng.ucsd.edu](mailto:yiw015@eng.ucsd.edu) (Y. Wang); [shuchien@ucsd.edu](mailto:shuchien@ucsd.edu) (S. C.)

14 **Abstract**

15 Optogenetics can control specific molecular events in living systems, but the penetration depth of  
16 light is typically limited at hundreds of micrometers. Focused ultrasound (FUS), on the other  
17 hand, can deliver energy safely and noninvasively into tissues at depths of centimeters. Here we  
18 have developed an acoustogenetic approach using short-pulsed FUS to remotely and directly  
19 control the genetics and cellular functions of engineered mammalian cells for therapeutic  
20 purposes. We applied this acoustogenetic approach to control chimeric antigen receptor (CAR) T  
21 cells with high spatiotemporal precision, aiming to mitigate the potentially lethal “on-target off-  
22 tumor” effects of CAR T cell therapy. We first verified the controllability of our acoustogenetic  
23 CAR T cells in recognizing and killing tumor cells *in vitro*, and then applied this approach *in*  
24 *vivo* to suppress tumor growth of both lymphoma and prostate cancers. The results indicate that  
25 FUS-based acoustogenetics can allow the noninvasive and remote activation, without any  
26 exogenous cofactor, of different types of CAR T cells for cancer therapeutics.

27 Optogenetics enables the control of specific molecular events and cellular functions in living  
28 systems with high spatiotemporal resolutions. However, optogenetics cannot reach deep tissues,  
29 with the penetration depth of light typically limited at micrometer to millimeter scales (1).  
30 Ultrasound can be focused to deliver mechanical energy safely and noninvasively into small  
31 volumes of tissue deep inside the body up to tens of centimeters (1). The rapidly oscillating  
32 pressure of focused ultrasound (FUS) waves and the resultant cycles of mechanical  
33 loading/unloading can lead to local heat generation in biological tissues. Aided by Magnetic  
34 Resonance Imaging (MRI) thermometry, FUS has been widely applied to clinically ablate  
35 tumors, and control drug delivery, vasodilation, neuromodulation (2), and transgene expression  
36 (3-5). Transcription factors and genetic circuits have also been engineered to convert the FUS-  
37 generated heat into genetic regulation to control microbial systems *in vivo* (6). However, there is  
38 a lack of general methods using FUS to control mammalian cell functions *in vivo* for therapeutic  
39 applications.

40

41 Chimeric antigen receptor (CAR) T cell therapy, where T cells are genetically programmed with  
42 redirected specificity against malignant cells, is becoming a paradigm-shifting approach for  
43 cancer treatment, especially for blood cancers (7). However, major challenges remain for solid  
44 tumors before CAR-based immunotherapy can be widely adopted. For instance, the non-specific  
45 targeting of the CAR T cells against normal tissues (on-target off-tumor toxicities) can be life-  
46 threatening: off-tumor toxicities against the lung, the brain, and the heart have caused multiple  
47 cases of deaths (7-10). Immunosuppressive corticosteroid therapy and suicide gene engineering  
48 are relatively effective in suppressing off-tumor toxicities and related cytokine release syndrome  
49 (CRS), but they fail to discriminate between beneficial T cell functions and toxic side effects

50 (11-13). Synthetic biology and genetic circuits have been used to enhance specificity and reduce  
51 off-tumor toxicity by creating chemically inducible dimerization of split CARs, inhibitory CARs  
52 (iCARs), and SynNotch to control CAR activation (8, 14-18). However, given the extensive  
53 overlaps of antigens between solid tumors and normal tissues, especially those under conditions  
54 of tissue injury/inflammation (19), it remains very difficult to identify ideal antigens and their  
55 combinations to differentiate tumors from normal tissues. There is hence an urgent need for a  
56 high-precision control of CAR-T cells to confine the activation at local sites of solid tumors.  
57 Recently, we demonstrated that ultrasound signals can be amplified by microbubbles coupled to  
58 cells engineered with the mechanosensor Piezo1 to precisely control CAR T cell activations (20).  
59 However, the presence of microbubbles as cofactors limits the application of this system *in vivo*.  
60 Here, we have engineered a new class of inducible CAR T cells that can be remotely and directly  
61 controlled by FUS without any exogenous cofactor. We show that short-pulsed FUS stimulation  
62 can activate the engineered T cells at the desired time and location to suppress tumor growth *in*  
63 *vivo*.

## 64 **Results**

### 65 **Heat-induced reporter gene activation**

66 We propose to genetically engineer T cells with inducible CAR cassettes that can be remotely  
67 and directly activated, without any exogenous cofactor, by MRI-guided FUS at local tumor sites  
68 for recognizing and eradicating the tumor cells (Fig. 1a).

69

70 We first tested the inducible activation of a reporter eGFP under the control of the heat-shock-  
71 protein promoter (Hsp). We assembled a dual-promoter reporter construct containing the Hsp-

72 driven eGFP and a constitutive PGK-driven mCherry (Fig. 1b). HEK 293T cells infected with  
73 the reporter lentivirus (fig. S1a) were heated at 43°C for 15 min. Real-time fluorescence imaging  
74 revealed that the heat-induced eGFP expression started as early as 2 hr after heat shock (HS) and  
75 persisted throughout the course of observation (Fig. 1c and Movie S1). Quantitative tracking of  
76 the dynamics of heat-induced eGFP expression by flow cytometry showed that 97% of the cells  
77 expressed eGFP at 6 hr post HS, and the percentage increased to 99% at 12 hr and remained  
78 stable for 2 days, while the mean fluorescence intensity peaked at 12 hr followed by a steady  
79 decrease (Fig. 1d). We then investigated the inducible effect of HS in primary human T cells  
80 hosting the dual-promoter eGFP reporter (fig. S1b). A 15-min HS induced a strong eGFP  
81 expression in 92.9% of the engineered T cells, in contrast to a background of 3.9% in control  
82 cells without HS (Fig. 1, e and f). The mean fluorescence intensity of the eGFP+ cells in the HS  
83 group was 10-fold of that in the control group without HS (Fig. 1g).

#### 84 **Heat-induced CAR expression and its functionality in Jurkat and primary human T cells**

85 In order to convert the transient heat stimulation to a sustained gene activation and cellular  
86 functions for therapeutic actions, we integrated the Cre-lox gene switch into the inducible  
87 system. The design is composed of two constructs, one containing the Hsp-driven Cre  
88 recombinase and the PGK-driven membrane c-Myc tag for cell sorting (“inducible Cre”, Fig.  
89 2a), and the other containing a lox-flanked “ZsGreen-STOP” sequence between a PGK promoter  
90 and an anti-CD19 CAR (“lox-stop CAR reporter”, Fig. 2a). As such, the excision of the “STOP”  
91 cassette mediated by the transient heat-induced Cre can cause a switch from ZsGreen to  
92 sustained CD19CAR production.

93

94 We first tested this heat-inducible gene switch system in Jurkat T cell lines (fig. S2a). A 15-min  
95 HS induced CAR expression in 76.6% of the cells when measured 24 hr after HS (Day 1), in  
96 contrast to a basal value of 14.0% in control cells without HS and a minimal leakage of 0.6% in  
97 cells infected with the lox-stop CAR reporter alone (Fig. 2b). The heat-induced CAR expression  
98 remained stable when measured 6 days after HS (Day 6, Fig. 2b). We further examined the  
99 functionality of the induced CD19CAR in engineered cells (Fig. 2c). Engineered Jurkat cells  
100 with (HS) or without (CT, control) a 15-min HS were co-cultured with CD19-expressing Nalm-6  
101 tumor cells for 24 hr. Quantification of the expression level of CD69 (an early T cell activation  
102 marker) revealed a 73.4% CD69+ cell population in the engineered Jurkat cells in the HS group,  
103 in contrast to a 11.9% in the control group (Fig. 2, d and e). These results indicate that the HS-  
104 induced CD19CAR is efficient for functional changes in engineered Jurkat T cells.

105

106 We then examined our system in primary human T cells (Fig. 2, a and c; fig. S2b). CAR  
107 antibody staining showed that a 15-min HS induced CAR expression in 29% of the T cells, in  
108 contrast to 1.9% in control cells without HS (Fig. 2f). The heat-inducible CAR T cells were then  
109 co-cultured with firefly luciferase (Fluc)-expressing Nalm-6 cells at different effector-to-target  
110 (E:T) ratios for cytotoxicity assays. The luminescence of the remaining Nalm-6 cells was  
111 quantified after 24-hr co-culture. The heat-stimulated T cells (HS) demonstrated increased  
112 cytotoxicity with increased E:T ratio, with the largest difference in cytotoxicity between the HS  
113 and control (CT) T cells observed at E:T = 1:5, eliminating 82.9% and 29.3% of the target tumor  
114 cells, respectively (Fig. 2g). The heat-stimulated CAR T cells also released significantly higher  
115 concentrations of cytokines (IFN- $\gamma$  and IL-2) than the control cells when co-cultured with Nalm-

116 6 cells (Fig. 2, h and i), verifying the functional capability gained with the HS-induced CAR T  
117 cells.

118

119 While the continuous 15 min HS could lead to strong gene inductions (Figs. 1 and 2), it may  
120 cause toxicity to cells (21). We hence investigated the effect of different HS patterns in primary  
121 human T cells (fig. S3). Our results showed that longer HS resulted in more cell death; however,  
122 pulsed HS was able to alleviate this toxicity while achieving induction levels comparable to that  
123 in response to continuous HS with the same total heating time (fig. S3). In particular, a pulsed  
124 HS with 50% duty cycle and a total heating time of 15 min (fig. S3a, Pattern 2) caused a strong  
125 induction of eGFP expression in 91.4% of the engineered T cells, with a minimal toxicity as  
126 evidenced by the 92.2% cell viability measured 24 hr after HS (fig. S3, b to d). Therefore, we  
127 applied this HS pattern (fig. S3a, Pattern 2) for *in vivo* therapeutic studies.

## 128 **MRI-guided FUS-induced gene activation in phantom and *in vivo***

129 MRI-guided FUS enables the delivery of thermal energy *in vivo* at confined local regions with  
130 high spatiotemporal resolutions (3, 4). We integrated an MRI-guided FUS system (Image Guided  
131 Therapy) with a 7T MRI as described in Methods. An annular array transducer is placed above  
132 the target region of the object to be heated (phantoms or small animals) in the MRI bore. MR  
133 images are acquired and transferred to Thermoguide software to calculate the temperature of the  
134 target region in real-time, which is fed back to the PID controller to automatically regulate the  
135 output power of the FUS generator, maintaining the temperature of the target region at the  
136 desired level (Fig. 3a, fig. S4).

137

138 We transduced Nalm-6 cells with a lentiviral dual-luciferase reporter containing inducible Fluc  
139 and constitutive Rluc (Hsp-Fluc-PGK-Rluc-mCherry; Rluc, *Renilla* luciferase; Fig. 3b) and  
140 embedded them in a tofu phantom approximately 7 mm deep from the top surface (Fig. 3c and  
141 Methods). We then focused the ultrasound on the embedded cells by changing the focal distance  
142 in the z direction. Three pulses of 5-min FUS stimulations caused a significant induction of gene  
143 expression as quantified by the Fluc/Rluc ratio of the cells assayed 8 hr later (Fig. 3d, Methods).  
144 The induction level is comparable to that of the positive control using thermal cycler with the  
145 same heating pattern (Fig. 3d), suggesting the acoustogenetic approach can remotely control  
146 gene activation in engineered cells with high efficiency.

147

148 We then used MRI-guided FUS to control local temperature *in vivo* in mouse (Fig. 3, e and f and  
149 Movie S2) and tested the FUS-induced gene activation using Nalm-6 cells with the dual-  
150 luciferase reporter *in vivo*. Significant gene induction was observed in the implanted cells with  
151 only two pulses of 5-min FUS stimulation (FUS+, after), in comparison to the basal level (FUS+,  
152 before) and the control groups (FUS-, before and after) (Fig. 3, g and h).

### 153 **FUS-inducible tumor cytotoxicity of the engineered CAR T cells *in vivo***

154 We next tested the tumor cytotoxicity of the FUS-inducible CAR T cells *in vivo*. We  
155 subcutaneously injected Nalm-6 cells (Fluc+) on both hindlimbs of NSG mice to generate  
156 matched bilateral tumors (Fig. 4a). Four days later, engineered CD19CAR T cells were  
157 subcutaneously injected at both tumor sites locally, followed by three pulses of 5-min FUS  
158 stimulation at 43°C on the left but not on the right tumor (Fig. 4a). Bioluminescence imaging  
159 revealed that FUS significantly suppressed tumor growth (Fig. 4, b and c). The results on the two  
160 tumors (FUS+ and FUS-) on the same mouse indicate that the FUS-activated CAR T cells at the



161 local site had negligible off-site effects in attacking the distal tissues on the contralateral  
162 hindlimb expressing the same antigens. We further performed a control experiment subjecting  
163 mice carrying bilateral tumors to FUS stimulation on one side, with neither site subjected to the  
164 injection of engineered CAR T cells (fig. S5a). The tumors with or without FUS stimulation  
165 exhibited similar growth profiles, indicating that FUS itself (with the chosen pattern) had no  
166 impact on tumor growth (fig. S5, b and c). Therefore, our results demonstrated that FUS can be  
167 used to precisely control the cytotoxicity of the engineered CD19CAR T cells *in vivo* against  
168 target tumor cells.

169

170 We further tested this acoustogenetic technology in controlling inducible CAR T cells against  
171 other types of tumors, particularly solid tumors. We engineered solid tumor human prostate  
172 cancer PC3 cells to express the prostate-specific membrane antigen (PSMA) and Fluc, and  
173 engineered primary human T cells with the Cre-lox mediated heat-inducible anti-PSMA CAR  
174 (PSMACAR; fig. S6a). We verified the functionality of the heat-inducible PSMACAR T cells  
175 through *in vitro* co-culture cytotoxicity assays and the associated cytokine assays (fig. S6, b to  
176 d). We then generated matched bilateral subcutaneous PC3 tumors (PSMA+, Fluc+) in NSG  
177 mice; five days later we subcutaneously injected heat-inducible PSMACAR T cells next to the  
178 tumor sites on both sides. The tumor regions on the left side were treated with three pulses of 5-  
179 min FUS, while those on the right remained unstimulated. Consistently, the tumors with FUS  
180 stimulation showed significantly inhibited growth as compared to the controls (Fig. 4, d and e).  
181 We further harvested the tumor tissues and quantified the related mRNA amount. The CD3  
182 mRNA in the FUS-treated tumors averaged 3-fold of that in the untreated ones, indicating more  
183 T cell infiltration in the FUS-treated solid prostate tumors (fig. S7a). Moreover, the amount of

184 Cre-mediated recombined CAR mRNA in the FUS-treated tumors was 9-fold of that in the  
185 untreated controls, verifying the FUS-induced DNA recombination and subsequent CAR  
186 expression in the engineered T cells at the tumor sites (fig. S7, b and c, and Methods). These  
187 results demonstrated the efficacy of FUS-based acoustogenetics in remote control of CAR T  
188 cells for treating different types of tumors *in vivo*, including solid tumors of prostate cancer.

## 189 **Discussion**

190 We developed an FUS-based acoustogenetic approach to remotely control, without any  
191 exogenous cofactor, the genetically engineered T cells capable of perceiving ultrasound signals  
192 and transducing them into genetic and cellular activations for therapeutic applications *in vivo*.  
193 This acoustogenetics technology enables the activation of CAR T cells at confined tissue regions,  
194 thus allowing the targeting of the less ideal antigens without causing non-specific off-site  
195 cytotoxicity. This is of critical importance given the extensive overlap of antigens between  
196 tumors and normal cells, particularly those under conditions of tissue injury and inflammation.  
197 The short-pulsed patterns of FUS stimulation should also minimize potential detrimental effects  
198 of hyperthermia and induce transient expression of synthetic protein regulators to circumvent  
199 severe immune responses. This acoustogenetic approach is highly modular, with the target CAR  
200 genes switchable to aim at different cancer types.

201

202 We employ the Cre-mediated gene switch to convert transient FUS inputs into sustained outputs  
203 of genetic and cellular activities for sufficient therapeutic efficiency. The nature of local  
204 activation should limit the number of activated cells off the tumor site and the potential non-  
205 specific cytotoxicity against normal tissues, as evidenced in our results (Fig. 4, b to e); if the Cre-  
206 mediated permanent activation of CAR becomes an issue in the future, degradation domains such

207 as dihydrofolate reductase (DHFR) can be fused to CAR to control the protein lifetime with an  
208 FDA-approved drug methotrexate (22). This “AND” gate with FUS and methotrexate should  
209 enhance the precision of controllable CAR T immunotherapy.

210

211 We anticipate that comparable therapeutic outcomes can be achieved in a reversible heat-  
212 inducible system without the Cre-lox gene switch, but this may require multiple rounds of FUS  
213 stimulation. In such a system, Hsp directly drives the production of CAR (Hsp-CAR) under FUS  
214 stimulation. Upon the withdrawal of FUS stimulation, HSFs gradually dissociate from Hsp,  
215 returning Hsp and its downstream transcriptional activities to the resting state. This recovery  
216 process is relatively fast, within 45 min after HS for *Drosophila* Hsp70 and approximately 60  
217 min after HS for human Hsp70 (23, 24). The dynamics of this heat-induced CAR expression  
218 hence largely depends on its protein lifetime, with the half-life of GFP-tagged CAR reported to  
219 be around 8 hr (16). Therefore, repeated FUS stimulation can be applied to maintain the CAR  
220 expression in the T cells (and hence their cytotoxicity) for a sustained period of time. We tested  
221 this concept by applying a 10-min HS every 48 hr in T cells with Hsp-eGFP, and indeed  
222 observed oscillatory patterns of the induced eGFP expression (fig. S8). We anticipate that T cells  
223 with a simple Hsp-CAR can also be repeatedly activated by FUS to achieve sustained CAR  
224 expression and cytotoxicity for a desired period of time or until tumor elimination. Such a  
225 reversible FUS-inducible system can further prevent “on-target off-tumor” toxicity of canonical  
226 CAR T therapy, as the T cells leaving the tumor site will no longer receive FUS stimulation and  
227 gradually lose CAR molecules. The tunable FUS pulses should also allow the precise control of  
228 the temporal activation patterns of CAR T cells for an optimized killing efficiency with  
229 controllable exhaustion.

230

231 We chose local injection at the tumor site to deliver T cells *in vivo*. Local administration of CAR  
232 T cells has been tested in animals and patients to overcome the obstacle of T cell homing  
233 associated with intravenous delivery, and has achieved promising therapeutic effects (16, 25, 26).  
234 For example, since the prostate is positioned near critical organ structures including urethra and  
235 neurovascular bundles, surgery or radiation therapy targeting the whole prostate gland to treat the  
236 prevalent locally-progressed prostate cancer (27) may cause adverse effects that would  
237 significantly impact quality of life (28, 29). Local delivery and activation of inducible CAR T  
238 cells using clinically available MRI-guided FUS systems should allow, without any exogenously  
239 added nanoparticle or cofactor, a high degree of precision and safety in eradicating tumor cells in  
240 these patients harboring locally progressed prostate cancer (29). In cases where intravenous  
241 delivery is required, it is also possible to equip the FUS-inducible CAR T cells with additional  
242 antigen binders and/or chemokine receptors to promote trafficking, infiltration, and the  
243 enrichment of these engineered cells at the tumor site before FUS activation (30, 31).

244

245 The short-pulsed stimulation and the biocompatible Hsp capable of inducing transient  
246 expressions of different synthetic protein regulators can potentially enhance the safety of gene  
247 therapy, circumventing detrimental host immune response. For instance, CRISPR-Cas9 proteins  
248 have been a powerful tool for research in genetic and epigenetic engineering, but can evoke  
249 adaptive immune responses and tissue damage *in vivo*, and are therefore potentially pathogenic if  
250 applied to correct inherited genetic defects to treat diseases (32). Protein engineering to remove  
251 immunogenic epitopes and humanize these synthetic proteins to circumvent this issue can be  
252 difficult owing to the high diversity of the human leukocyte antigen (HLA) loci (33). Using our

253 acoustogenetic approach, the transiently induced Hsp-driven synthetic regulators (e.g. Cas9) can  
254 be cleared in a timely manner to mitigate or evade the adaptive immune response, hence offering  
255 a new option for gene therapy.

256  
257 Each component of this FUS-based acoustogenetics, i.e. ultrasound devices, molecular thermo-  
258 sensors, and genetic/epigenetic transducing modules, is highly modular and will continue to evolve  
259 for greater precision and reduced immunogenicity. In fact, stretchable electronic circuits are being  
260 developed to fabricate wearable patches of ultrasound transducers (34). The leverage of  
261 technological advancements of different fields into FUS-based acoustogenetics should be able to  
262 drive the development of these fields to open up new frontiers. We envision that the current state  
263 of acoustogenetics is analogous to optogenetics at its infancy. Before the functional demonstration  
264 of channelrhodopsin in neuronal cells (35), it was challenging to manipulate molecular activities in  
265 live cells at high spatiotemporal resolutions. With the technological integration and convergence of  
266 optics, genetic circuits, and light-sensitive proteins, optogenetics is rapidly reaching its full potential.  
267 Based on this analogy, acoustogenetics may undergo a similar trajectory to provide a broadly  
268 applicable method and usher in an era of applying ultrasound for the direct, remote, and noninvasive  
269 control of genetically engineered cells for therapeutics.

## 270 **Methods**

### 271 **Cloning**

272 Plasmids used in this paper are listed in Table S1. Cloning strategies include Gibson Assembly  
273 (NEB, E2611L) and T4 ligation (NEB, M0202L). PCR was performed using synthesized primers  
274 (Integrated DNA Technologies) and Q5 DNA polymerase (NEB, M0491). The sequences of the  
275 constructed plasmids were verified by Sanger sequencing (Genewiz).

276

## 277 **General cell culture**

278 HEK 293T cells were cultured in DEME (Gibco, 11995115) with 10% FBS (Gibco, 10438026)  
279 and 1% Penicillin-Streptomycin (Gibco, 15140122). Jurkat, Nalm-6, and PC3 cells were cultured  
280 in RPMI 1640 (Gibco, 22400105) with 10% FBS and 1% P/S. Primary human T cells were  
281 cultured in complete RPMI 1640 supplemented with 100 U/mL recombinant human IL-2  
282 (PeproTech, 200-02). Cells were cultured at 37°C in a humidified 5% CO<sub>2</sub> incubator.

283

## 284 **Staining and flow cytometry**

285 Staining of cell surface markers (e.g., c-Myc, CD69, etc) for flow cytometry was performed  
286 using fluorophore-conjugated antibodies according to manufacturers' protocols. In general, cells  
287 were washed twice and resuspended in 100 µL wash buffer (PBS + 0.5% BSA) containing the  
288 suggested amounts of antibodies, incubated in dark at room temperature for suggested durations,  
289 and washed three times before being analyzed using a BD flow cytometer. Gating was based on  
290 non-engineered cells with the same staining. Flow cytometry data were analyzed using FlowJo  
291 software (Tree Star).

292

## 293 ***In vitro* heat shock**

294 For Fig. 1c and Movie S1, cells seeded in a glass bottom dish were heated at 43°C for 15 min  
295 using a heating stage (Instec) integrated with a Nikon Eclipse Ti inverted microscope. Images  
296 were acquired in real-time to obtain the kinetics of the induced fluorescent protein. For the  
297 remainder of the *in vitro* heat shock (HS) experiment, unless otherwise specified, cells were  
298 washed and resuspended in cell culture medium at a concentration of  $2 \times 10^6$  cells/mL, aliquoted

299 into 8-strip PCR tubes with 50  $\mu$ L/tube, and heat shocked at 43°C using a thermal cycler (Bio-  
300 Rad, 1851148) with various patterns as indicated (Table S2). Cells were returned to standard  
301 culture condition after HS. The gene induction levels were quantified by flow cytometry 12 hr  
302 after HS in Fig. 1, f and g, and fig. S3, d and e.

303

#### 304 **Engineered cells**

305 The engineered cells (excluding primary human T cells) used in this work are listed in Table S3.  
306 Lentiviruses were used to deliver engineered genes into the cells. Fluorescence-activated cell  
307 sorting (FACS), when needed, was performed at UCSD Human Embryonic Stem Cell Core  
308 Facility by professional technicians following standard protocols.

309

#### 310 **Quantification of CAR expression in Jurkat cells**

311 Jurkat cells were either transduced with a lentiviral cocktail (inducible Cre and lox-stop CAR  
312 reporter, Fig. 2a) followed by indicated HS (Fig. 2b), or transduced with the lox-stop CAR  
313 reporter lentivirus alone without HS. CAR expression was quantified by CAR antibody staining  
314 (an anti-mouse IgG, F(ab')<sub>2</sub> fragment specific antibody; Jackson ImmunoResearch, 115-606-  
315 072) and flow cytometry 24 hr after HS. Live single cells were gated for CAR expression  
316 analysis. Non-engineered Jurkat cells were stained with the same antibody to generate the CAR+  
317 gate.

318

#### 319 **Quantification of CD69 expression in Jurkat cells**

320 Jurkat cells transduced with a lentiviral cocktail (inducible Cre and lox-stop CAR reporter, Fig.  
321 2a) were treated with or without HS at 43°C for 15 min, and co-cultured with target tumor cells

322 for 24 hr. The cells were then stained by an APC anti-human CD69 antibody (BioLegend,  
323 310910) and analyzed by flow cytometry. ZsGreen+ cells (representing the engineered Jurkat  
324 cells) were gated for analysis of CD69 expression. Non-engineered Jurkat cells co-cultured with  
325 target tumor cells were stained with the same antibody to generate the CD69+ (APC+) gate.

326

### 327 **Isolation, culture, transduction and MACS of primary human T cells**

328 Human peripheral blood mononuclear cells (PBMCs) were isolated from buffy coats (San Diego  
329 Blood Bank) using Lymphocyte Separation Medium (Corning, 25-072-CV) following the  
330 manufacturer's instructions. Primary human T cells were isolated from PBMCs using Pan T Cell  
331 Isolation Kit (Miltenyi, 130-096-535) and activated with Dynabeads® Human T-Expander  
332 CD3/CD28 (Gibco, 11141D). Three days later, lentivirus concentrated using PEG-it (SBI,  
333 LV825A-1) was added to the T cells at MOI = 10, followed by spinoculation in a 96-well plate  
334 coated with Retronectin (Takara, T100B). T cells were further expanded and dynabeads were  
335 removed prior to downstream procedures (e.g., magnetic-activated cell sorting (MACS), *in vitro*  
336 HS, *in vivo* injection, etc.).

337

338 For *in vitro* and *in vivo* cytotoxicity studies, T cells were transduced with a lentiviral cocktail of  
339 inducible Cre and lox-stop CAR reporter (Fig. 2a). MACS was performed using Anti-c-Myc-  
340 Biotin antibodies and Anti-Biotin microbeads (Miltenyi, 130-092-471 and 130-097-046)  
341 following the manufacturer's instructions to enrich c-Myc+ cells. A representative double  
342 positive efficiency after MACS is 69%, 95% for the c-Myc+ and 71.4% for the ZsGreen+ cells  
343 (fig. S2b). CAR expression in the engineered inducible CAR T cells with or without HS was  
344 quantified using the CAR antibody as described above.



345

346 **Luciferase-based cytotoxicity assay**

347 A constant number of  $5 \times 10^4$  Fluc<sup>+</sup> Nalm-6 cells were mixed with engineered primary human T  
348 cells with or without HS (pre-washed and resuspended with complete RPMI without IL-2) at  
349 effector-to-target (E:T) ratios of 1:50, 1:20, 1:10, 1:5, 1:1, 5:1 or no T cells (“target cell only”).  
350 The mixtures were then cultured in round bottom 96 well plates for 24 hr, centrifuged to remove  
351 the supernatant (which was harvested for quantification of cytokine production), and assayed  
352 with the Bright-Glo<sup>TM</sup> Luciferase Assay System (Promega, E2610) following the manufacturer's  
353 instructions to quantify the luminescence of each sample. The cytotoxicity (%) of Sample X was  
354 calculated as  $(1 - \text{Luminescence of X} / \text{Luminescence of “target cell only”}) \times 100\%$ .

355

356 For cytotoxicity assay using PC3 cells as the target,  $1 \times 10^4$  PSMA<sup>+</sup> Fluc<sup>+</sup> PC3 cells were  
357 seeded onto TC-treated flat bottom 96 well plates (Corning, 3603). Except for “target cell only”  
358 wells, engineered primary human T cells with or without HS (washed and resuspended with  
359 complete RPMI without IL-2) were added 6 hr later at E:T ratios of 1:10, 1:5, 1:1, 5:1, 10:1,  
360 20:1. The luminescence was quantified 24 hr after co-culture as described above.

361

362 **Quantification of cytokine production**

363 The supernatant of effector-target cell co-culture was harvested. The concentrations of cytokines  
364 IL-2 and IFN- $\gamma$  were quantified using the corresponding ELISA kits (BD, 555190 and 555142).

365

366 **T cell viability assay**

367 Non-engineered primary human T cells were heat shocked as described above and kept under  
368 normal culture condition for 24 hr. Cell viability was then assessed using the FITC Annexin V  
369 Apoptosis Detection Kit I (BD, 556547) following the manufacturer's instructions. The cells  
370 stained negative for both Annexin V and PI were counted as live cells.

371

### 372 **MRI-guided FUS**

373 The MRI-guided FUS system is composed of a 1.5 MHz 8-element annular array transducer, a  
374 16-channel broadband RF generator, a piezo motor-based X-Y positioning stage, and a degassing  
375 and water circulation system (Image Guided Therapy, France). MR images acquired using a  
376 Bruker 7T MRI system were transferred to ThermoGuide software (Image Guided Therapy,  
377 France) to generate phase images and real-time temperature maps. Using PID controller, the  
378 software automatically regulates the output power of the generator to maintain the temperature at  
379 the focal spot at a desired value as described elsewhere (6, 36).

380

381 Animal experiments were performed following Protocol S15285 approved by UCSD IACUC.  
382 NSG mice (6-8 weeks old) were purchased from Jackson Laboratory (JAX) and shaved prior to  
383 FUS stimulation. Anesthesia was induced using 2% isoflurane-oxygen mixture and maintained  
384 with 1.5% isoflurane-oxygen mixture during FUS stimulation. The mouse was laid on its side on  
385 an MR bed containing an agarose gel pad and a surface coil. A pressure pad was placed under  
386 the mouse to monitor its respiration rate, and a rectal thermal probe was used to provide  
387 feedback for the delivering of warm air into the bore to maintain the mouse's core temperature at  
388 approximately 37°C. The ultrasound transducer was positioned right above the targeted region

389 on the mouse's hindlimb. Thin layers of SCAN ultrasound gel (Parker labs) were applied at the  
390 skin-transducer and skin-bed interfaces.

391

392 The ThermoGuide software regulates the temperature in a 3 x 3 pixel square (3 - 4 mm<sup>2</sup>)  
393 centered at the ultrasound focus (Fig. 3e). A PID controller is used to maintain the average  
394 temperature of the target square at 6°C above reference by controlling the output power of the  
395 FUS generator, with the reference temperature being 37°C as measured by the rectal thermal  
396 probe. As such, the MRI-guided FUS enabled temperature elevation to 43°C locally at the focal  
397 area in the hindlimb of an anesthetized mouse.

398

### 399 **FUS stimulation in tofu phantom**

400 For FUS stimulation on cells in the tofu phantom, Nalm-6 cells were lentivirally transduced with  
401 the dual-luciferase reporter (Fig. 3b, Hsp-Fluc-PGK-Rluc-mCherry) and FACS-sorted. The cells  
402 were resuspended in culture medium and mixed with matrigel (Corning, 354262) at 1:1 volume  
403 ratio on ice. Extra-firm tofu was cut into a 15-mm thick pad, and an 8-mm deep hole of 8-mm  
404 diameter was drilled from the top. A microcentrifuge tube of 7.5-mm diameter (Fisherbrand, 05-  
405 408-120) was cut to 8-mm long by removing the lid and the conical bottom, and was inserted  
406 into the hole in the tofu phantom. Cell-matrigel mixture of 150 µL was added into the hole (~3  
407 mm thick) and allowed to gel at room temperature. The rest of the hole and the gap between the  
408 tube and the tofu phantom were filled up with matrigel. After gelation, the assembly was  
409 inverted and positioned onto the MR bed containing the surface coil. The ultrasound transducer  
410 was positioned above the tofu phantom with its center aligned with that of the tube. Thin layers

411 of ultrasound gel were applied at the tofu-transducer and tofu-bed interfaces. A thermal probe  
412 was inserted into the distal end of the tofu phantom to provide reference temperature readings.  
413  
414 MR images of the assembly were acquired and transferred to ThermoGuide to calculate the  
415 theoretical ultrasound focal position. Test FUS shots were delivered to determine the actual focal  
416 position. Steering was applied to focus the ultrasound at the region immediately above the cells.  
417 Three pulses of 5-min FUS stimulations at 43°C were applied. The cell-matrigel mixture was  
418 then recovered from the tube, placed in cell culture medium, and returned to a standard 37°C cell  
419 culture incubator. After 6 hr, the culture was centrifuged to remove the supernatant, and the cell-  
420 matrigel pellet was incubated in a Cell Recovery Solution (Corning, 354253) at 4°C for 1 hr to  
421 retrieve the Nalm-6 cells from matrigel. The Fluc and Rluc luminescence of the cells was  
422 quantified using the Dual-Luciferase® Reporter Assay System (Promega, E1910) following the  
423 manufacturer's instructions.

424

#### 425 ***In vivo* bioluminescence imaging**

426 *In vivo* bioluminescence imaging (BLI) was performed using an *In vivo* Imaging System (IVIS)  
427 Lumina LT Series III (PerkinElmer). For Fluc imaging, 150 mg/kg D-Luciferin (GoldBio,  
428 LUCK) was administered intraperitoneally (i.p.). BLI started 10 min after substrate injection  
429 until peak signal was acquired. For Rluc imaging, 200 µL 0.295 mM ViviRen™ (Promega,  
430 P1232) (37) was administered i.p. BLI started 15 min after substrate injection until peak signal  
431 was acquired. BLI of Fluc and Rluc in the same mouse, when needed, was performed 4 hr apart.  
432 Images were analyzed using Living Image software (PerkinElmer), and the integrated Fluc  
433 luminescence intensities within regions of interest were quantified to represent tumor sizes.

434

435 **FUS-inducible gene activation *in vivo***

436 NSG mice (male, 6-8 weeks old) were subcutaneously injected with  $2 \times 10^6$  dual-luciferase  
437 reporter Nalm-6 cells at the hindlimb. One week later, the experimental mice received two pulses  
438 of 5-min FUS stimulation at  $43^\circ\text{C}$  targeted at the implanted cells, while the control mice  
439 remained unstimulated. The *in vivo* Fluc and Rluc luminescence was quantified 4 hr before and  
440 12 hr after FUS stimulation, as described above.

441

442 ***In vivo* tumor cytotoxicity of FUS-inducible CAR T cells.**

443 NSG mice (male, 6-8 weeks old) were subcutaneously injected with  $2 \times 10^5$  Fluc+ Nalm-6 cells  
444 (or  $2 \times 10^5$  PSMA+ Fluc+ PC3 cells, for PC3 tumors) on both hindlimbs to generate matched  
445 bilateral tumors. Four days later (or five days later, for PC3 tumors),  $1 \times 10^6$  inducible primary  
446 human CAR T cells prepared as described above were injected subcutaneously and locally at  
447 tumor regions. Within 4 - 8 hr after T cell injection, three pulses of 5-min FUS stimulation  
448 targeted at  $43^\circ\text{C}$  were applied on the left tumor region as described above, while the tumor on the  
449 right hindlimb received no FUS stimulation to serve as the control. Tumor aggressiveness was  
450 monitored by BLI twice a week as described above until euthanasia criteria were met.

451

452 **Quantification of mRNA expression in tumor tissue.**

453 PC3 tumors (Fig. 4, d and e) were harvested 22 days after tumor implantation (17 days after T  
454 cell injection and FUS stimulation). The tumors were disrupted and homogenized, and the same  
455 amount of lysate from each tumor was used to extract total RNA with the RNeasy Mini Kit  
456 (Qiagen, 74104) followed by reverse transcription using the same amount of template RNA.

457 Quantitative PCR (qPCR) was performed using iTaq<sup>TM</sup> Universal SYBR<sup>RTM</sup> Green Supermix  
458 (Bio-Rad, 1725121), the same amount of template cDNA, and the specific primers described  
459 below. The mRNA levels were normalized to  $\beta$ -actin.

460

461 The first pair of specific primers were designed on human CD3 $\gamma$  chain to detect the presence of  
462 human T cells. The second pair of specific primers were designed based on the lox-stop  
463 PSMACAR reporter sequence to reflect CAR expression after FUS-induced Cre recombination  
464 (fig. S6, a and b). The forward primer anneals from -60 bp of the mouse PGK promoter,  
465 downstream of the transcription starting site (TSS), and the reverse primer anneals from +20 bp  
466 of the PSMACAR gene (38). With the presence of FUS-induced Cre recombinase, the sequence  
467 from the second half of LoxH to the first half of LoxP will be excised, resulting in a 200 bp  
468 qPCR product. Without Cre-mediated recombination, this pair of primers will theoretically  
469 generate a 984-bp fragment. We adopted a two-step qPCR protocol with combined  
470 annealing/extension at 60°C for only 15 sec to ensure the specific amplification of the 200-bp  
471 fragment, but not the 984 bp fragment, as confirmed by gel electrophoresis and Sanger  
472 sequencing of the qPCR product (fig. S6, c and d; sequence alignment performed in Serial  
473 Cloner). Therefore, the second pair of specific primers can detect the successfully recombined  
474 CAR mRNA amount.

475

#### 476 **Statistics.**

477 One-way ANOVA followed by Tukey's multiple comparisons test is used for Figs. 1, f and g, and  
478 fig. S3, b and d to e. Student's t-test is used for Fig. 2d. Two-way ANOVA followed by Sidak's  
479 multiple comparisons test is used for Figs. 2, b, g to I, 3g, 4, b and d, fig. S4b, S5, b to d.

## 480 **Acknowledgments**

481 We thank Dr. Franck Couillaud (University of Bordeaux, France) for providing the Hsp template  
482 and Dr. Michel Sadelain (Sloan Kettering Institute, USA) for the PSMA scFv and PSMA  
483 constructs and the Nalm-6 cells. We also thank Dr. Erik Dumont and Ms. Stéphanie Hoarau-  
484 Recco (Image Guided Therapy, France) for their most valuable help on the FUS system.

485 **Funding:** This work was supported in part by grants from NIH HL121365, GM125379,  
486 GM126016, CA204704 and CA209629 (Y. Wang). **Author contributions:** Y.Wu, S.C. and  
487 Y.Wang designed research; Y.Wu, Y.L, Z.H., X.W., Z.J., J.L., P.L., L.Z., M.A., Y.P., R.B., A.J.  
488 performed research; Y.Wu and Y.L. analyzed data; Y.Wu, T. L., S.C. and Y.Wang wrote the  
489 manuscript. All authors reviewed the manuscript and have given approval to the final version of  
490 the manuscript. **Competing interests:** Y.Wang is a scientific co-founder of Cell E&G Inc and  
491 Acoustic Cell Therapy Inc. These financial interests do not affect the design, conduct or  
492 reporting of this research. **Data and materials availability:** All data is available in the main text  
493 or the supplementary materials.

## 494 **Figure legends**

495 **Fig. 1. Heat-inducible gene activation. (a)** Design of the FUS-controllable CAR T therapy  
496 technology. T cells engineered with the heat-inducible CAR and localized at the tumor region are  
497 activated by MRI-guided FUS for recognizing and eradicating target tumor cells. **(b)** Schematics  
498 of the dual-promoter eGFP reporter. **(c-d)** **(c)** Fluorescent images of inducible eGFP and  
499 constitutive mCherry, and **(d)** the percentage of eGFP<sup>+</sup> cells and their mean fluorescence  
500 intensity after a 15-min HS at 43°C in HEK 293T cells containing the dual-promoter reporter. **(e-**  
501 **g)** Gene induction in primary human T cells with the dual-promoter eGFP reporter. **(e)**

502 Representative flow cytometry profiles of eGFP expression. **(f)** The percentage of eGFP<sup>+</sup> cells  
503 and **(g)** their mean fluorescence intensity. In (e-g), CT: without HS; HS: with a continuous 15-  
504 min HS. MCherry<sup>+</sup> cells were gated for eGFP analysis. N = 3 repeats; error bar: SEM. \*\*\*\*: p <  
505 0.0001.

506

507 **Fig. 2. Heat-inducible CD19CAR expression and functional outcomes in Jurkat and**  
508 **primary T cells. (a)** Schematics of the transgenes: the inducible Cre and the lox-stop CAR  
509 reporter. **(b)** Inducible CAR expression in Jurkat cells hosting the lox-stop CAR reporter alone  
510 (lox), or both transgenes in (a) with (HS) or without HS (CT). **(c)** Schematics of assays accessing  
511 the functionality of the heat-induced CAR T cells, including CD69 expression, cytotoxicity, and  
512 cytokine release. **(d)** The percentage of CD69<sup>+</sup> cells in Jurkat with both transgenes in (a). **(e)**  
513 Representative flow cytometry data showing the histogram of CD69 expression in (d). **(f)**  
514 Representative histograms showing the percentage of CAR<sup>+</sup> cells in primary T cells with both  
515 transgenes in (a). **(g)** The cytotoxicity of the T cells in (f) against Nalm-6 tumor cells at various  
516 E:T ratios. **(h-i)** Quantification of **(h)** IFN- $\gamma$  and **(i)** IL-2 cytokine release associated with (g).  
517 Arrow: cytokine level not detectable. In (b) and (d) to (f), CT: without HS; HS: with a  
518 continuous 15-min HS. N = 3; error bar: SEM. \*\*\*: p < 0.001; \*\*\*\*: p < 0.0001; ns: no  
519 significant difference.

520

521 **Fig. 3. MRI-guided FUS-inducible gene activation in phantom and *in vivo*. (a)** Schematics of  
522 the MRI-guided FUS system. **(b)** The dual-luciferase reporter containing the inducible Hsp-  
523 driven Fluc and constitutive PGK-driven Rluc fused with mCherry. **(c)** The experimental setup  
524 of FUS stimulation on cells in a tofu phantom. **(d)** Gene induction level in Nalm-6 cells



525 containing the dual-luciferase reporter with three pulses of 5-min heating by MRI-guided FUS in  
526 tofu phantom (FUS) or by thermal cycler (HS). CT: without heating. Gene induction level is  
527 quantified by the Fluc/Rluc ratio and normalized to CT. N = 3. **(e)** Left: color-coded temperature  
528 map superimposed on MRI images at different time points during a 5-min FUS stimulation at  
529 43°C on the hindlimb of an anesthetized mouse. Right: close-up of the red rectangle region on  
530 the left. The dotted white square outlines the region of interest (ROI) for temperature regulation.  
531 **(f)** The average temperature of the ROI during FUS stimulation in (e). The yellow shadow  
532 represents the predefined target temperature (43°C) and duration (300 sec) of FUS stimulation.  
533 **(g)** Gene induction *in vivo* by MRI-guided FUS. Nalm-6 cells containing the dual-luciferase  
534 reporter were injected subcutaneously into NSG mice followed by FUS stimulation. FUS+ or  
535 FUS-: with or without two pulses of 5-min FUS stimulation at 43°C. Gene induction was  
536 quantified by the *in vivo* Fluc/Rluc ratio and normalized to the “FUS-, before” group, as  
537 indicated by the dotted line. N = 4 mice. **(h)** Representative bioluminescence images of Fluc  
538 expression before and after FUS stimulation in (g). Error bar: SEM. \*: p < 0.05; \*\*: p < 0.01; ns:  
539 no significant difference.

540

541 **Fig. 4. FUS-controllable tumor suppression by the engineered CAR T cells *in vivo*. (a)**

542 Timeline of the *in vivo* experiment using NSG mouse bearing matched bilateral tumors as the  
543 animal model. The tumor on the left flank received FUS stimulation (FUS+) and the one on the  
544 right received no FUS (FUS-) following injection of engineered CAR T cells. **(b-e)** The  
545 quantified tumor growth and representative bioluminescence images of **(b-c)** Nalm-6 tumors or  
546 **(d-e)** PC3 tumors with (FUS+) or without (FUS-) FUS stimulation. Tumor size was quantified  
547 using the integrated Fluc luminescence intensity of the tumor region and normalized to that of

548 the same tumor on the first measurement. N = 4 mice. Error bar: SEM. \*:  $p < 0.05$ ; \*\*:  $p < 0.01$ ;  
549 \*\*\*\*:  $p < 0.0001$ .

550

## 551 References

- 552 1. R. Y. Tsien, Imagining imaging's future. *Nat Rev Mol Cell Biol* **Suppl**, SS16-21 (2003).
- 553 2. M. Thanou, W. Gedroyc, MRI-Guided Focused Ultrasound as a New Method of Drug  
554 Delivery. *J Drug Deliv* **2013**, 616197 (2013).
- 555 3. R. Deckers *et al.*, Image-guided, noninvasive, spatiotemporal control of gene  
556 expression. *Proceedings of the National Academy of Sciences of the United States of*  
557 *America* **106**, 1175-1180 (2009).
- 558 4. E. Guilhon *et al.*, Image-guided control of transgene expression based on local  
559 hyperthermia. *Mol Imaging* **2**, 11-17 (2003).
- 560 5. S. Wang, V. Zderic, V. Frenkel, Extracorporeal, low-energy focused ultrasound for  
561 noninvasive and nondestructive targeted hyperthermia. *Future Oncol* **6**, 1497-1511  
562 (2010).
- 563 6. D. I. Piraner, M. H. Abedi, B. A. Moser, A. Lee-Gosselin, M. G. Shapiro, Tunable thermal  
564 bioswitches for in vivo control of microbial therapeutics. *Nature chemical biology* **13**, 75-  
565 80 (2017).
- 566 7. M. L. Davila *et al.*, Efficacy and toxicity management of 19-28z CAR T cell therapy in B  
567 cell acute lymphoblastic leukemia. *Science translational medicine* **6**, 224ra225 (2014).
- 568 8. D. Chakravarti, W. W. Wong, Synthetic biology in cell-based cancer immunotherapy.  
569 *Trends in biotechnology* **33**, 449-461 (2015).
- 570 9. M. V. Maus, S. A. Grupp, D. L. Porter, C. H. June, Antibody-modified T cells: CARs take  
571 the front seat for hematologic malignancies. *Blood* **123**, 2625-2635 (2014).
- 572 10. R. A. Morgan *et al.*, Case report of a serious adverse event following the administration  
573 of T cells transduced with a chimeric antigen receptor recognizing ERBB2. *Molecular*  
574 *therapy : the journal of the American Society of Gene Therapy* **18**, 843-851 (2010).
- 575 11. G. Akpek, S. M. Lee, V. Anders, G. B. Vogelsang, A high-dose pulse steroid regimen for  
576 controlling active chronic graft-versus-host disease. *Biol Blood Marrow Transplant* **7**,  
577 495-502 (2001).
- 578 12. A. Di Stasi *et al.*, Inducible apoptosis as a safety switch for adoptive cell therapy. *The*  
579 *New England journal of medicine* **365**, 1673-1683 (2011).
- 580 13. M. Themeli, M. Sadelain, Combinatorial Antigen Targeting: Ideal T-Cell Sensing and  
581 Anti-Tumor Response. *Trends Mol Med* **22**, 271-273 (2016).
- 582 14. J. H. Cho, J. J. Collins, W. W. Wong, Universal Chimeric Antigen Receptors for  
583 Multiplexed and Logical Control of T Cell Responses. *Cell* **173**, 1426-1438 e1411  
584 (2018).
- 585 15. V. D. Fedorov, M. Themeli, M. Sadelain, PD-1- and CTLA-4-based inhibitory chimeric  
586 antigen receptors (iCARs) divert off-target immunotherapy responses. *Science*  
587 *translational medicine* **5**, 215ra172 (2013).
- 588 16. K. T. Roybal *et al.*, Precision Tumor Recognition by T Cells With Combinatorial Antigen-  
589 Sensing Circuits. *Cell* **164**, 770-779 (2016).

- 590 17. C. Y. Wu, K. T. Roybal, E. M. Puchner, J. Onuffer, W. A. Lim, Remote control of  
591 therapeutic T cells through a small molecule-gated chimeric receptor. *Science* **350**,  
592 aab4077 (2015).
- 593 18. M. M. D'Aloia, I. G. Zizzari, B. Sacchetti, L. Pierelli, M. Alimandi, CAR-T cells: the long  
594 and winding road to solid tumors. *Cell Death Dis* **9**, 282 (2018).
- 595 19. S. I. Grivennikov, F. R. Greten, M. Karin, Immunity, inflammation, and cancer. *Cell* **140**,  
596 883-899 (2010).
- 597 20. Y. Pan *et al.*, Mechanogenetics for the remote and noninvasive control of cancer  
598 immunotherapy. *Proceedings of the National Academy of Sciences of the United States*  
599 *of America* **115**, 992-997 (2018).
- 600 21. I. C. Miller, M. Gamboa Castro, J. Maenza, J. P. Weis, G. A. Kwong, Remote Control of  
601 Mammalian Cells with Heat-Triggered Gene Switches and Photothermal Pulse Trains.  
602 *ACS Synth Biol* **7**, 1167-1173 (2018).
- 603 22. M. V. Raimondi *et al.*, DHFR Inhibitors: Reading the Past for Discovering Novel  
604 Anticancer Agents. *Molecules* **24**, (2019).
- 605 23. K. Abravaya, B. Phillips, R. I. Morimoto, Attenuation of the heat shock response in HeLa  
606 cells is mediated by the release of bound heat shock transcription factor and is  
607 modulated by changes in growth and in heat shock temperatures. *Genes Dev* **5**, 2117-  
608 2127 (1991).
- 609 24. S. K. Ghosh, A. Missra, D. S. Gilmour, Negative elongation factor accelerates the rate at  
610 which heat shock genes are shut off by facilitating dissociation of heat shock factor. *Mol*  
611 *Cell Biol* **31**, 4232-4243 (2011).
- 612 25. M. Martinez, E. K. Moon, CAR T Cells for Solid Tumors: New Strategies for Finding,  
613 Infiltrating, and Surviving in the Tumor Microenvironment. *Front Immunol* **10**, 128 (2019).
- 614 26. P. Sridhar, F. Petrocca, Regional Delivery of Chimeric Antigen Receptor (CAR) T-Cells  
615 for Cancer Therapy. *Cancers (Basel)* **9**, (2017).
- 616 27. U. Mahmood *et al.*, Current clinical presentation and treatment of localized prostate  
617 cancer in the United States. *J Urol* **192**, 1650-1656 (2014).
- 618 28. H. B. Musunuru *et al.*, Active Surveillance for Intermediate Risk Prostate Cancer:  
619 Survival Outcomes in the Sunnybrook Experience. *J Urol* **196**, 1651-1658 (2016).
- 620 29. A. R. Rastinehad *et al.*, Gold nanoshell-localized photothermal ablation of prostate  
621 tumors in a clinical pilot device study. *Proc Natl Acad Sci U S A* **116**, 18590-18596  
622 (2019).
- 623 30. M. Boice *et al.*, Loss of the HVEM Tumor Suppressor in Lymphoma and Restoration by  
624 Modified CAR-T Cells. *Cell* **167**, 405-418 e413 (2016).
- 625 31. K. T. Roybal *et al.*, Engineering T Cells with Customized Therapeutic Response  
626 Programs Using Synthetic Notch Receptors. *Cell* **167**, 419-432 e416 (2016).
- 627 32. W. L. Chew *et al.*, A multifunctional AAV-CRISPR-Cas9 and its host response. *Nat*  
628 *Methods* **13**, 868-874 (2016).
- 629 33. A. M. Moreno *et al.*, Immune-orthogonal orthologues of AAV capsids and of Cas9  
630 circumvent the immune response to the administration of gene therapy. *Nat Biomed Eng*  
631 **3**, 806-816 (2019).
- 632 34. C. H. Wang *et al.*, Monitoring of the central blood pressure waveform via a conformal  
633 ultrasonic device. *Nat Biomed Eng* **2**, 687-695 (2018).
- 634 35. E. S. Boyden, F. Zhang, E. Bamberg, G. Nagel, K. Deisseroth, Millisecond-timescale,  
635 genetically targeted optical control of neural activity. *Nature neuroscience* **8**, 1263-1268  
636 (2005).
- 637 36. B. Z. Fite *et al.*, Magnetic resonance thermometry at 7T for real-time monitoring and  
638 correction of ultrasound induced mild hyperthermia. *PloS one* **7**, e35509 (2012).
- 639 37. M. Otto-Duessel *et al.*, In vivo testing of Renilla luciferase substrate analogs in an  
640 orthotopic murine model of human glioblastoma. *Mol Imaging* **5**, 57-64 (2006).

- 641 38. M. W. McBurney *et al.*, The mouse P<sub>gk</sub>-1 gene promoter contains an upstream activator  
642 sequence. *Nucleic Acids Res* **19**, 5755-5761 (1991).  
643

**Figure 1**

**a**

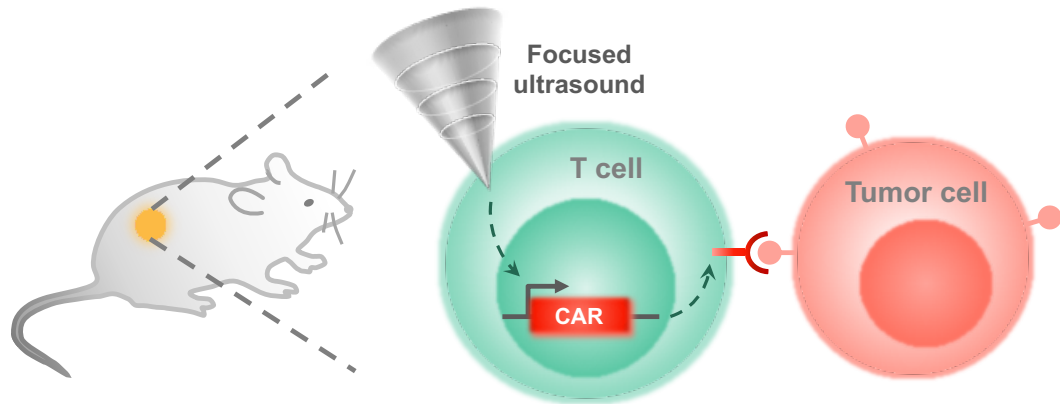

**b**

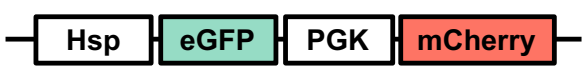

**c**

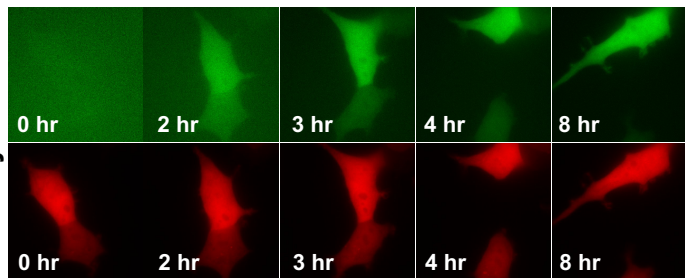

**d**

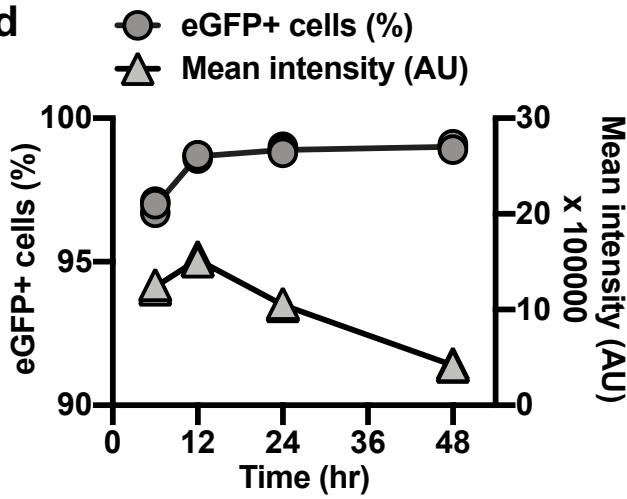

**e**

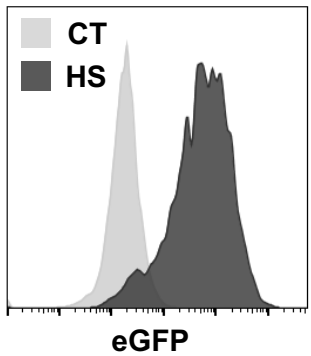

**f**

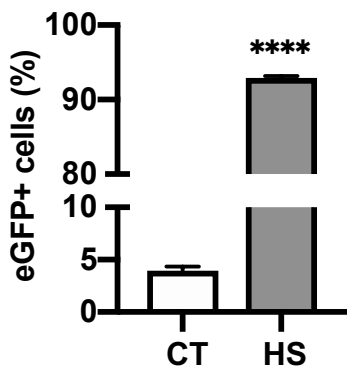

**g**

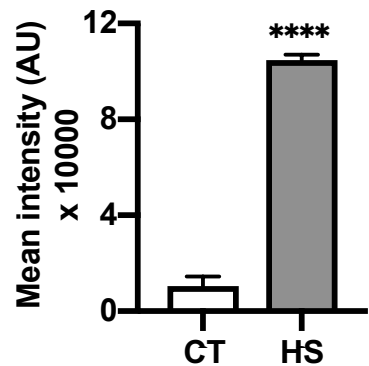

**Figure 2**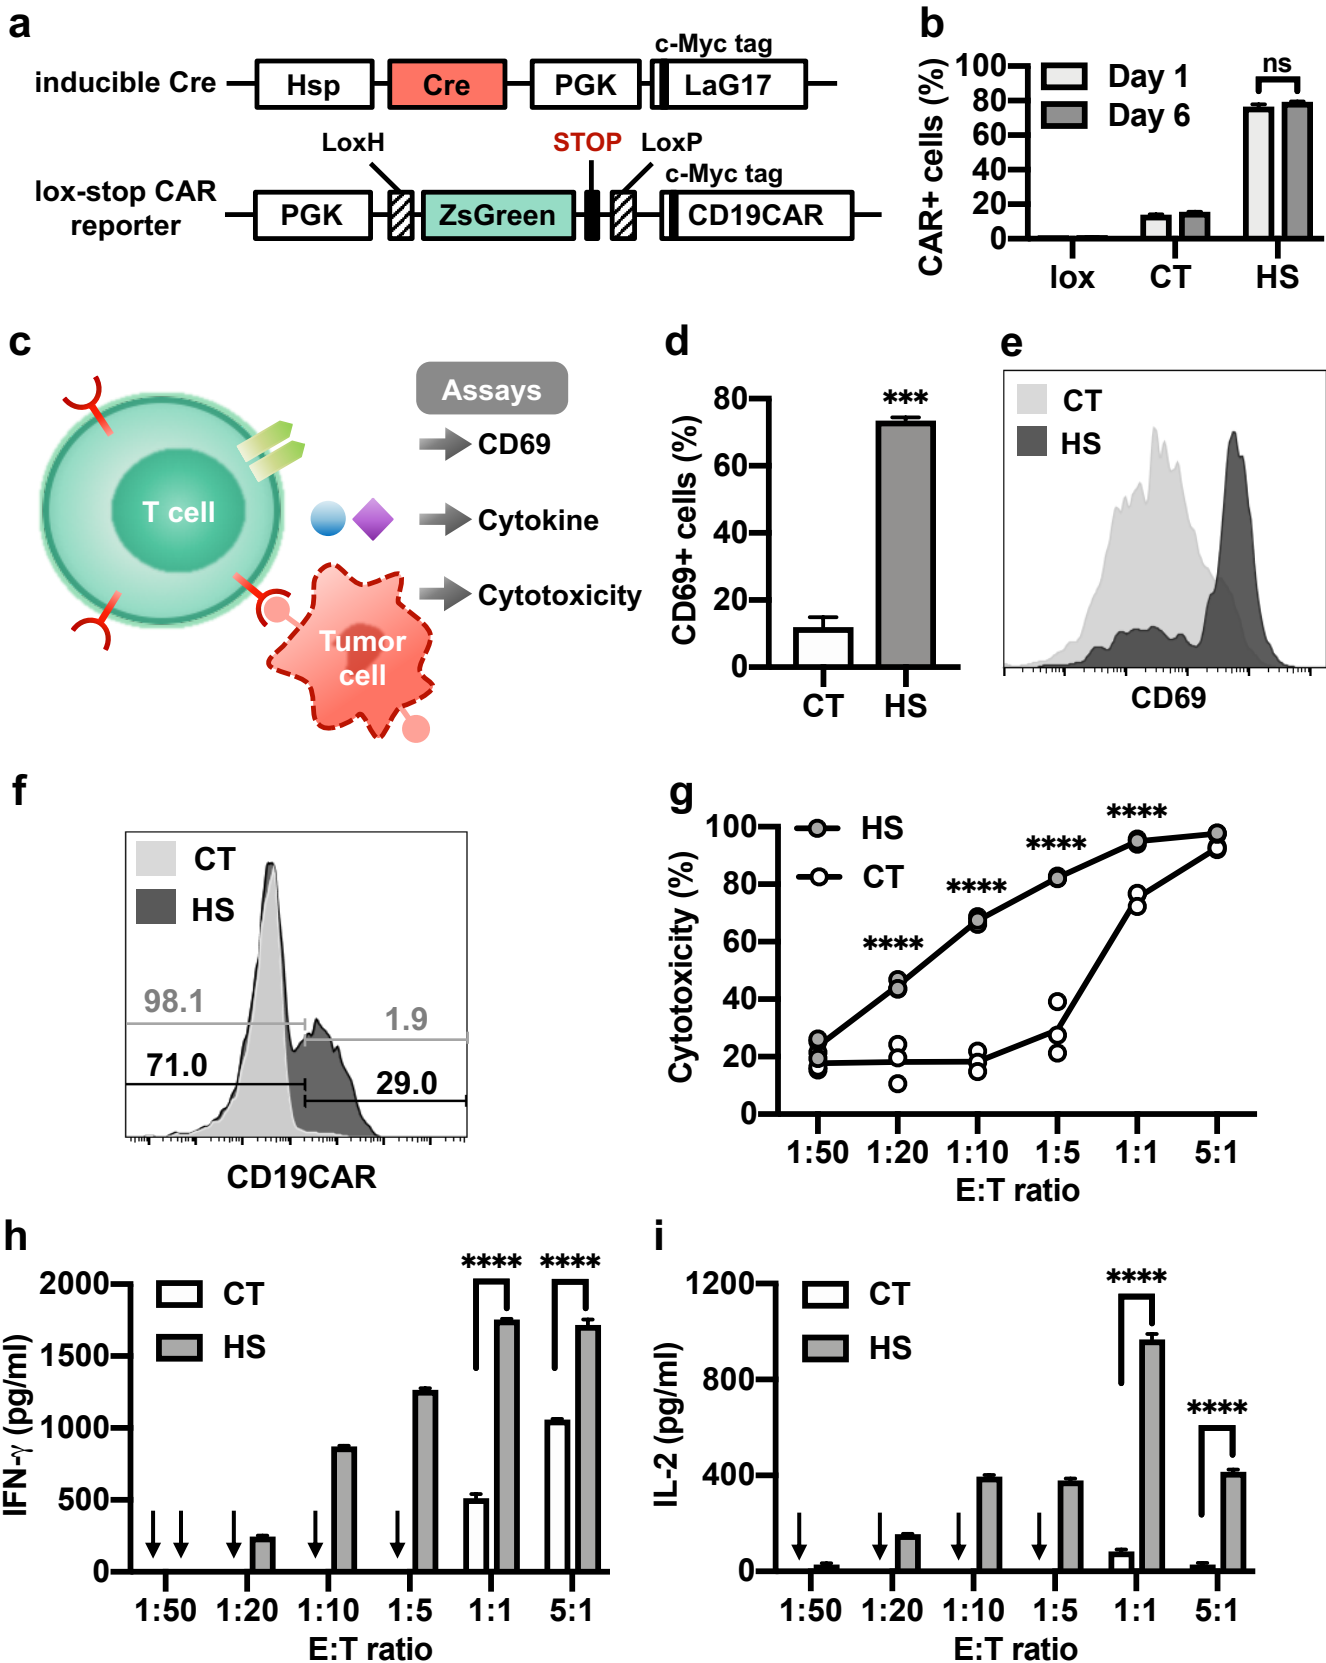

# Figure 3

**a**

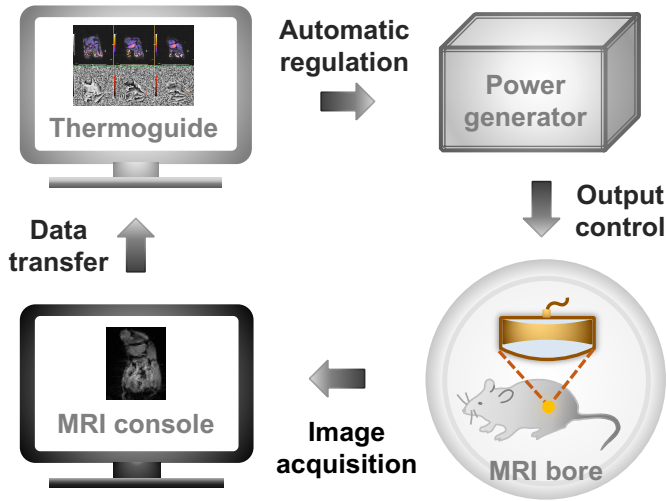

**c**

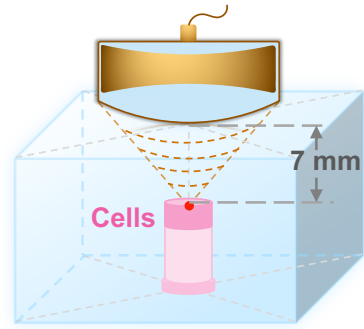

**d**

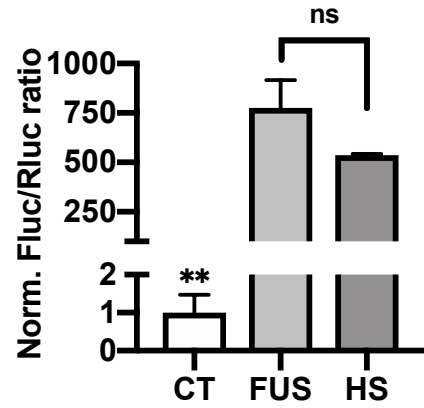

**b**

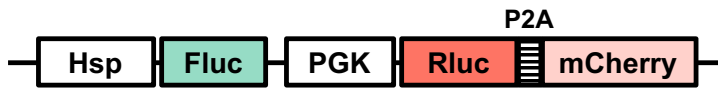

**e**

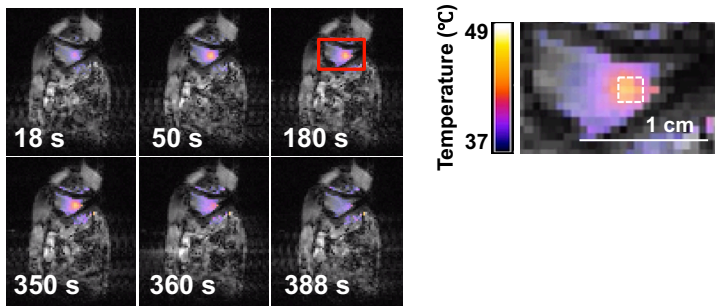

**f**

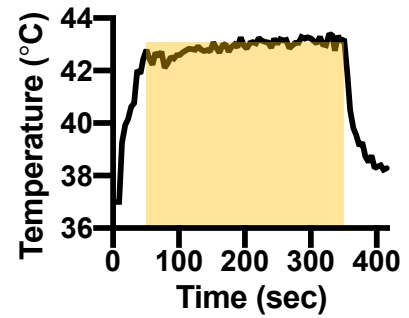

**g**

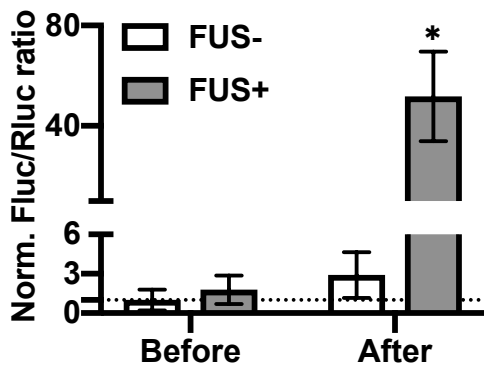

**h**

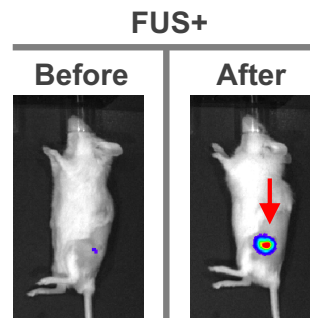

**Figure 4**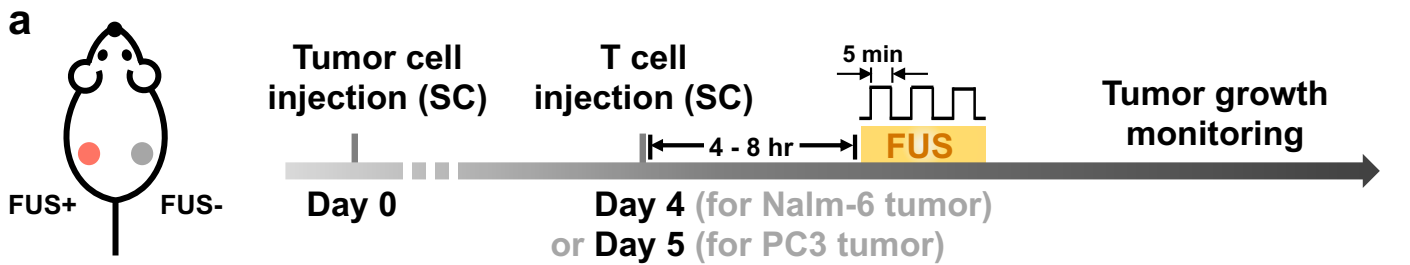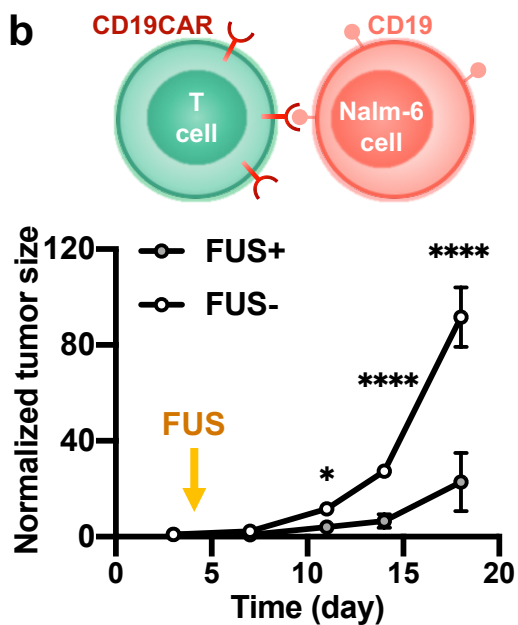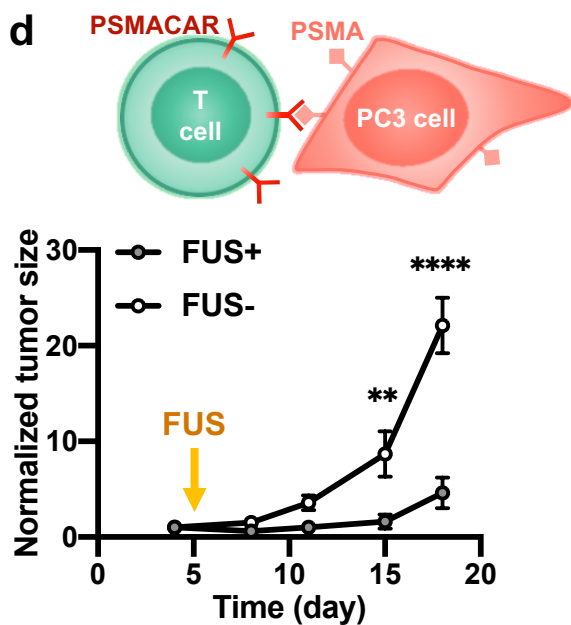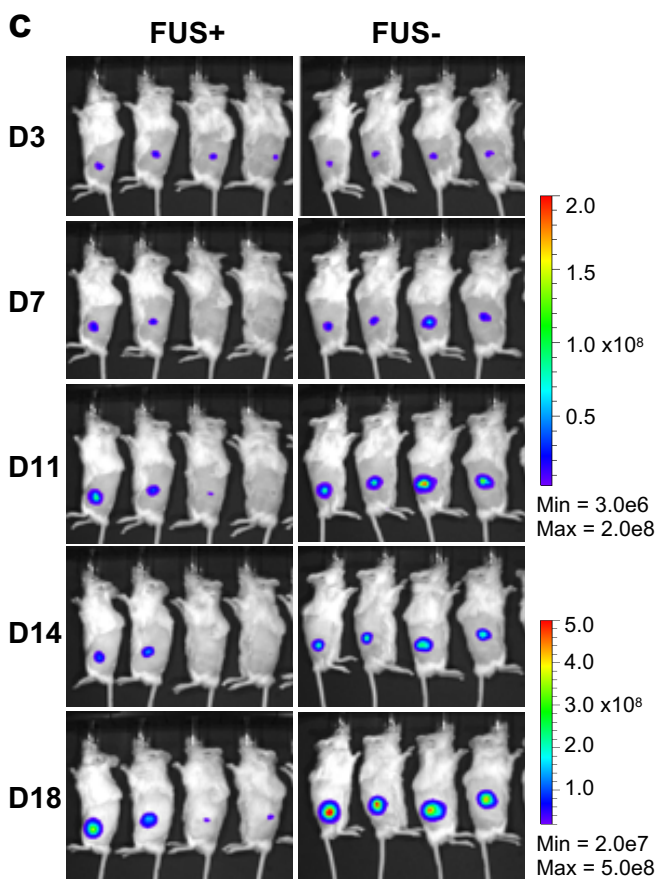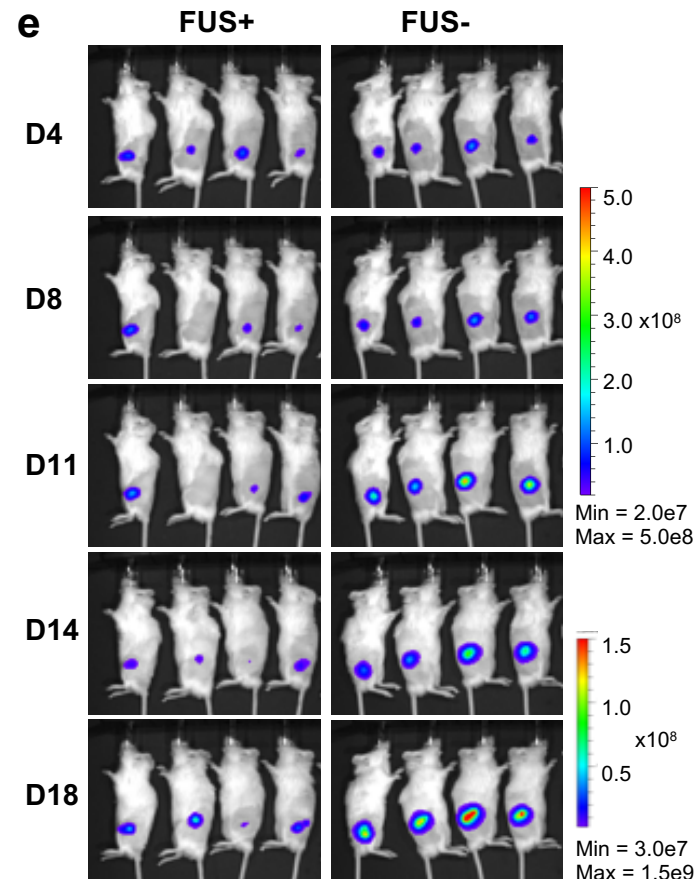

Source: https://biorxiv.org/content/biorxiv/early/2020/02/19/2020.02.18.955005.full-text.pdf
