# Supplementary material for: Acoustogenetic Control of CAR T Cells via Focused Ultrasound
Source: bioRxiv or medRxiv preprint supplement (doi:10.1101/2020.02.18.955005), 2020-02-19
Supplement: Supplementary file [file media-1.pdf]

1  
2  
3  
4  
5  
6  
7

Supplementary Materials for  
**Acoustogenetic Control of CAR T Cells via Focused Ultrasound**

Yiqian Wu, Yahan Liu, Ziliang Huang, Xin Wang, Zhen Jin, Jiayi Li, Praopim Limsakul,  
Linshan Zhu, Molly Allen, Yijia Pan, Robert Bussell, Aaron Jacobson, Thomas Liu, Shu Chien \*,  
Yingxiao Wang\*

Correspondence to: [yiw015@eng.ucsd.edu](mailto:yiw015@eng.ucsd.edu) (Y. Wang); [shuchien@ucsd.edu](mailto:shuchien@ucsd.edu) (S. C.)

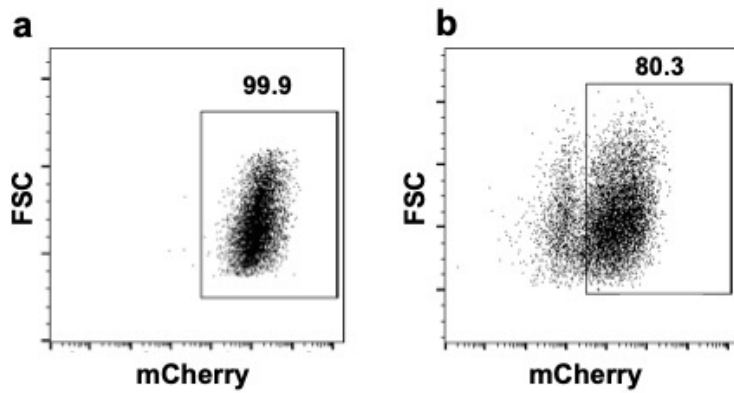

8

9 **Fig. S1. Transduction efficiencies of the dual-promoter eGFP reporter.** Representative flow

10 cytometry data showing the lentiviral transduction efficiencies of the dual-promoter eGFP

11 reporter (Hsp-eGFP-PGK-mCherry) in **(a)** HEK293T cells (99.9%) and **(b)** primary human T

12 cells (80.3%). The mCherry+ gates are based on the profiles of the corresponding non-

13 engineered cells.

14

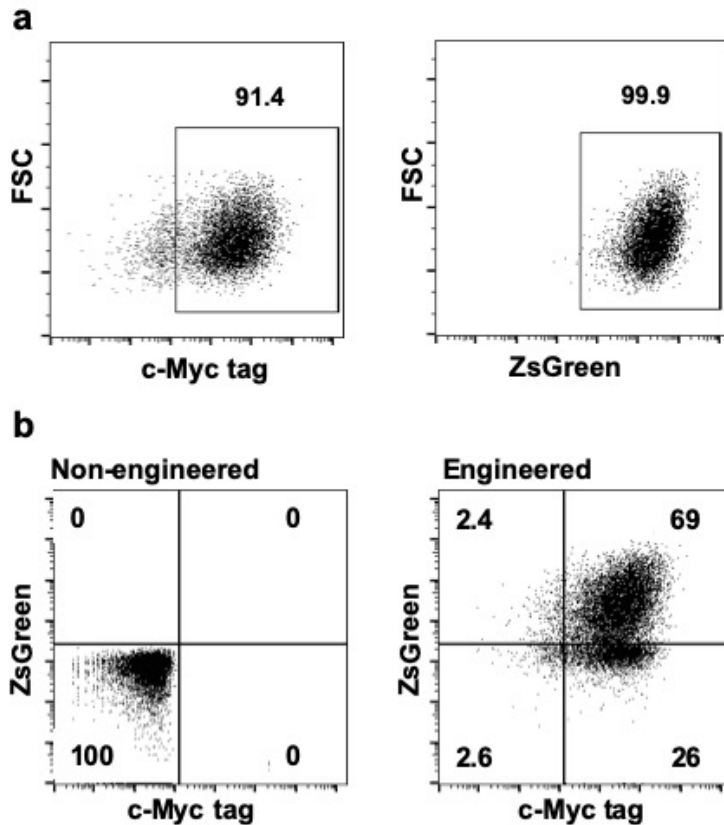

15

16 **Fig. S2. Transduction efficiencies of the heat-inducible Cre-lox system in Jurkat and**

17 **primary human T cells. (a)** Jurkat cells were lentivirally co-transduced with inducible Cre

18 (Hsp-Cre-PGK-cMyc-LaG17) and lox-stop CAR reporter (PGK-LoxH-ZsGreen-stop-LoxP-

19 CAR). Shown are the transduction efficiencies of cells without HS. **(b)** Primary human T cells

20 were co-transduced with inducible Cre (Hsp-Cre-PGK-cMyc-LaG17) and lox-stop CAR reporter

21 (PGK-LoxH-ZsGreen-stop-LoxP-CAR) lentiviruses. The cells were sorted through MACS for c-

22 Myc+ cells. The representative transduction efficiency after MACS is 69% for the c-Myc and

23 ZsGreen double positive, 95% for the c-Myc+ and 71.4% for the ZsGreen+ cells. Gating is based

24 on the corresponding non-engineered cells with the same c-Myc antibody staining.

25

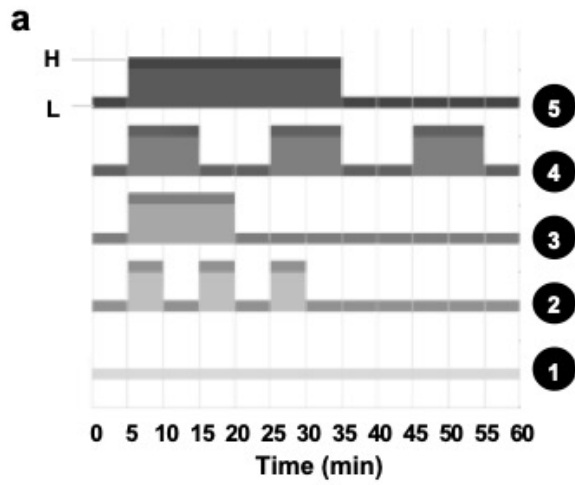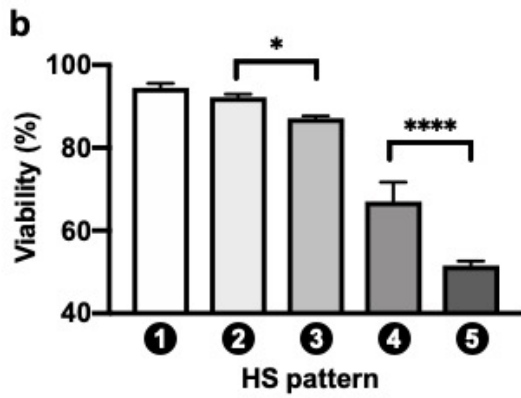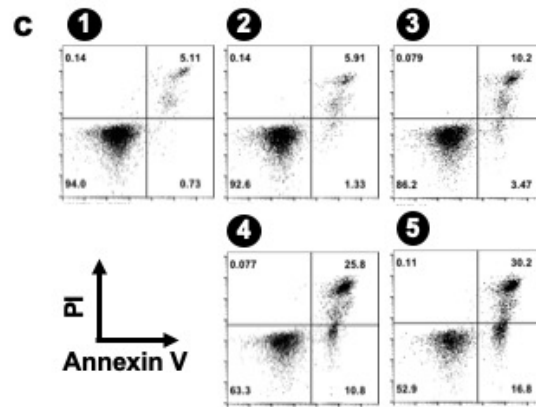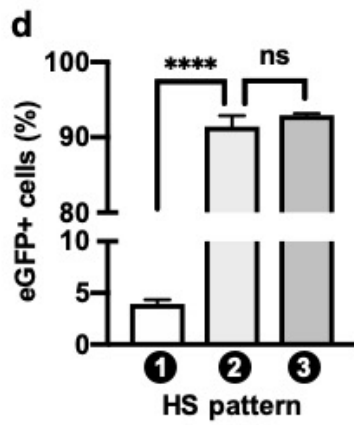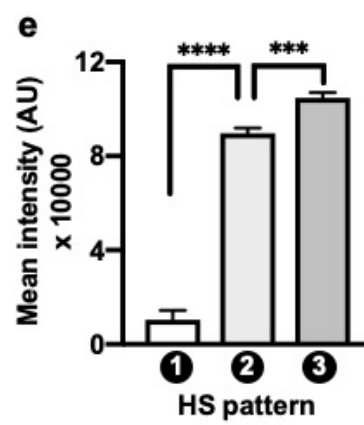

28 **Fig. S3. Thermal tolerance of primary human T cells.** (a) Different patterns of HS. H: heating  
29 at 43°C; L: resting at 37°C. (b) The viability of non-transduced primary human T cells 24 hr  
30 after different patterns of HS in (a) assayed by Annexin V and PI staining. (c) Representative  
31 flow cytometry data of (b). (d-e) (d) The percentage of eGFP<sup>+</sup> cells and (e) their mean  
32 fluorescence intensity in primary human T cells engineered with the dual-promoter eGFP  
33 reporter in Fig. 1b under different HS patterns in (a). N = 3 repeats; error bar: SEM. \*: p < 0.05;  
34 \*\*\*: p < 0.001; \*\*\*\*: p < 0.0001; ns: no significant difference.

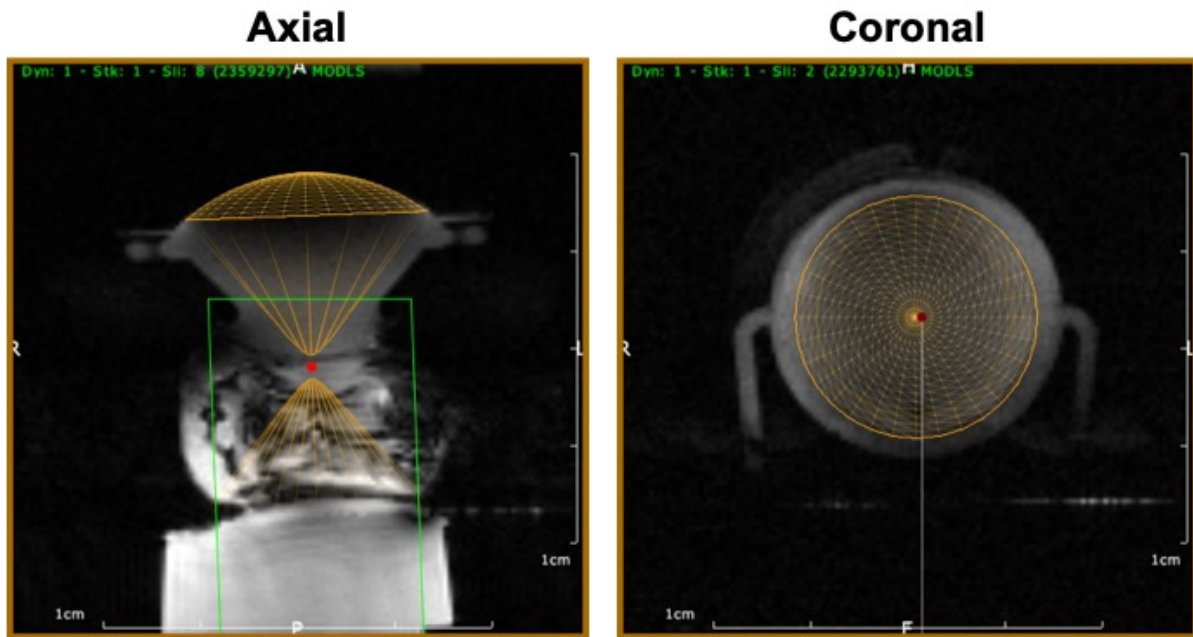

35  
36 **Fig. S4. MRI images of the *in vivo* FUS experimental setup.** An anesthetized mouse is laid on  
37 its side on an MR bed containing an agarose gel pad. The ultrasound transducer is positioned  
38 above the targeted region on the mouse's hindlimb. Three-dimensional representations of the  
39 transducer generated by the ThermoGuide software are superimposed on the MRI images. Left:  
40 an axial view of the experimental setup. The bright red dot indicates the theoretical ultrasound  
41 focal point. Right: a coronal view showing the transducer.

42

43

44

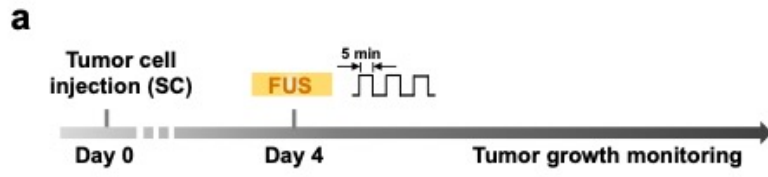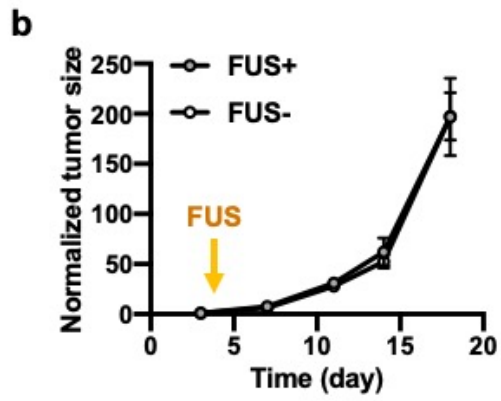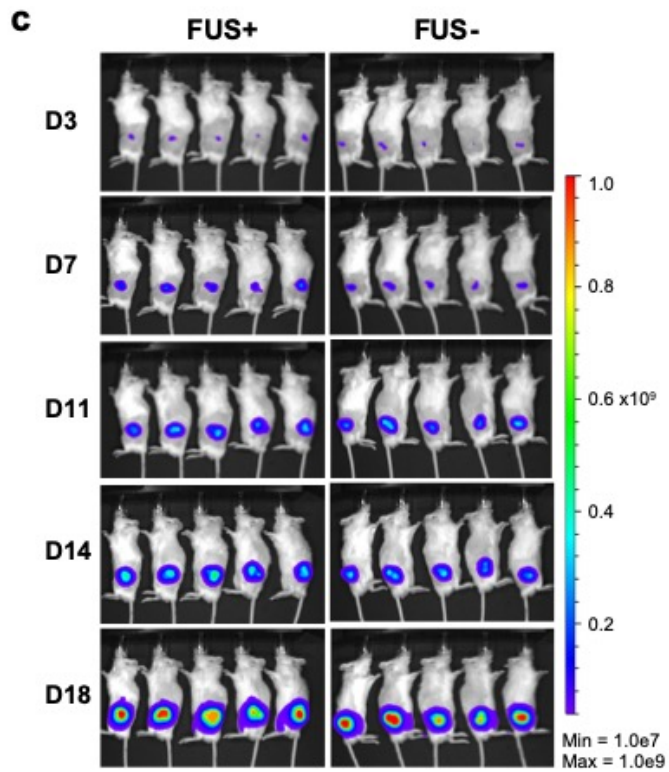

46 **Fig. S5. FUS has no detectable effect on tumor growth. (a)** Timeline of *in vivo* experiment.  
47 Fluc+ Nalm-6 cells are subcutaneously injected into NSG mice to generate matched bilateral  
48 tumors. Four days later, three pulses of 5-min FUS stimulation targeted at 43°C was applied on  
49 the tumor on one side (left), while the tumor on the other side (right) received no FUS  
50 stimulation. Tumor growth after FUS stimulation was monitored by bioluminescence imaging.  
51 **(b-c)** The **(b)** quantified tumor growth and **(c)** representative bioluminescence images of the  
52 tumors with (FUS+) or without (FUS-) FUS stimulation. Tumor size is quantified using the  
53 integrated luminescence intensity and normalized to that of the same tumor on the first  
54 measurement. N = 5 mice. Error bar: SEM. No significant difference was detected.



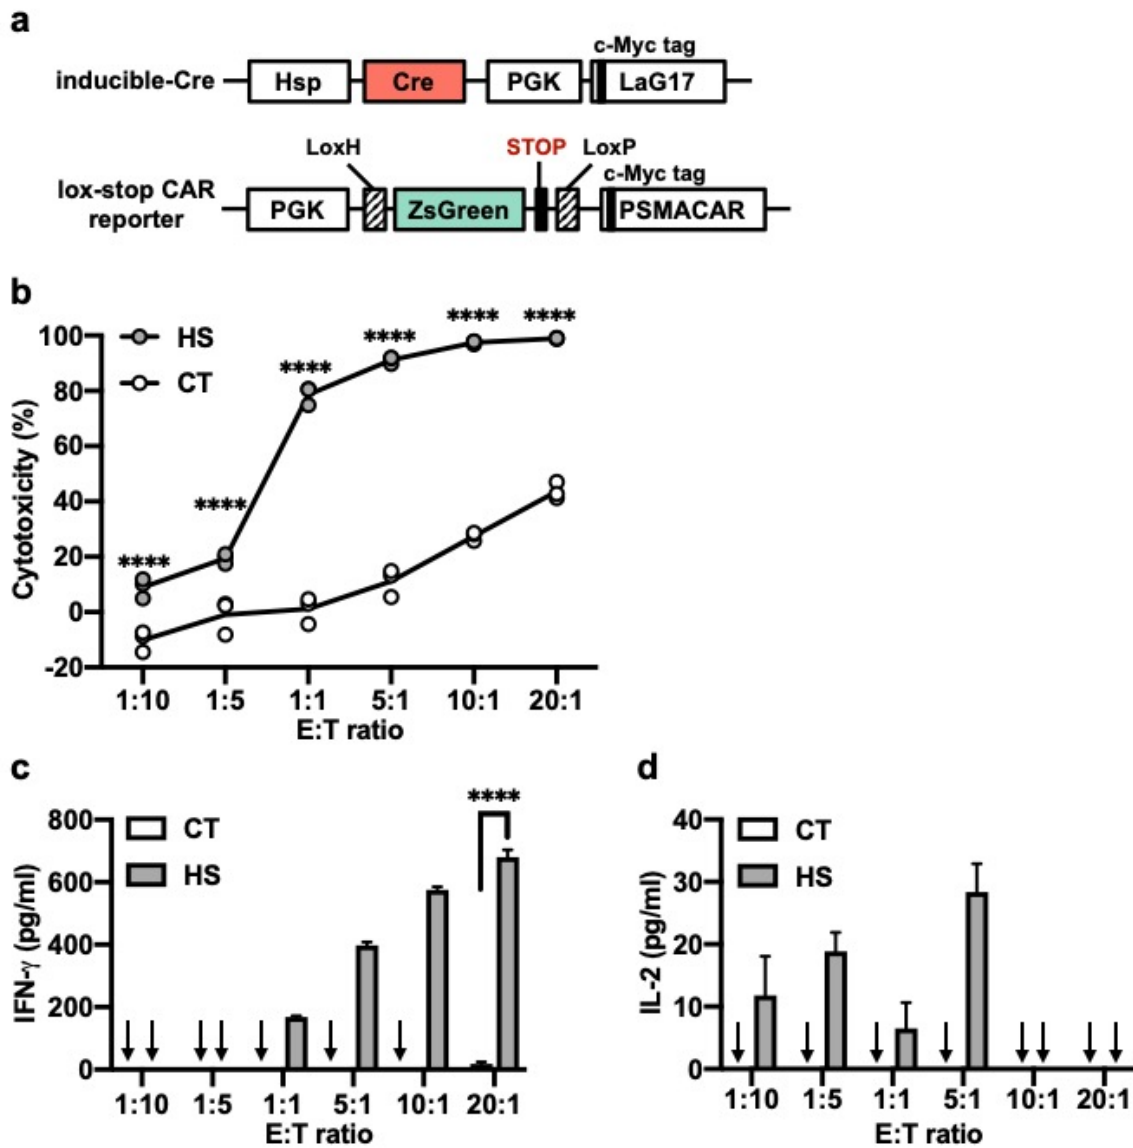

55

56 **Fig. S6. Functionality of the heat-inducible PSMACAR T cells *in vitro*.** (a) Schematics of the  
 57 transgenes used in this figure, including the heat-inducible Cre and the lox-stop PSMACAR  
 58 reporter. (b) Cytotoxicity of the T cells engineered with the transgenes in (a) against Fluc+  
 59 PSMA+ PC3 tumor cells at various E:T ratios. (c-d) Quantification of (c) IFN- $\gamma$  and (d) IL-2  
 60 cytokine release associated with (b). Arrow: cytokine level not detectable. CT: without HS. HS:  
 61 with a continuous 15-min HS. N = 3; error bar: SEM. \*\*\*\*: p < 0.0001.

**a**

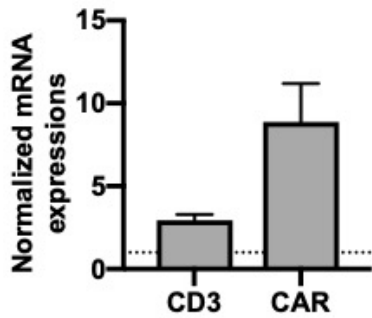

**b**

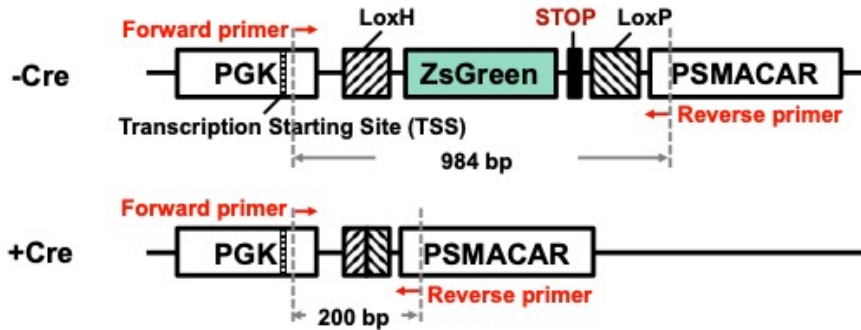

**c**

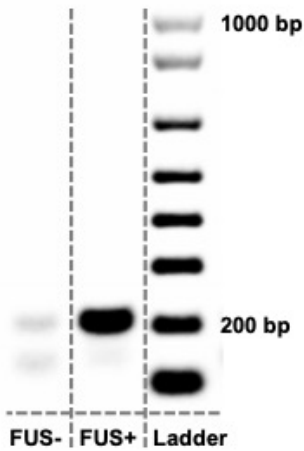

**d**

|       |     |                                                               |     |
|-------|-----|---------------------------------------------------------------|-----|
| Seq_1 | 1   | -acgcttcaaaaagcgcacgctctgccgcgctgttctcctcttcctcatctcggggcctt  | 59  |
| Seq_2 | 1   | TACGCTTCAAAAAGCGCACGCTCGCCGCGCTGTTCTCCTCTTCCTCATCTCCGGGCCTTTC | 60  |
| Seq_1 | 60  | gacctgcagcccaagcttaccGAGACCCAAGCTGGCTAGAAATTACCTCATATAGCATACA | 119 |
| Seq_2 | 61  | GACCTGCAGCCCAAGCTTACCGAGACCCAAGCTGGCTAGAAATTACCTCATATAGCATACA | 120 |
| Seq_1 | 120 | TTATACGAAGTTATGTTTcggAATTCGCGCGCAggaattgatccttcgaactagtGGATC  | 179 |
| Seq_2 | 121 | TTATACGAAGTTATGTTTCGGAATTCGCGCGCAGGAATTGATCCTTCGAACTAGTGGATC  | 180 |
| Seq_1 | 180 | CATGGCTCTCCCAGTGACTGC                                         | 200 |
| Seq_2 | 181 | CATGGCTCTCCCAGTGACNNN                                         | 201 |

Seq\_1: theoretical sequence after Cre-lox recombination

Seq\_2: combined Sanger sequencing results

Pink: PGK promoter (partial)

Green: first half of LoxH

Blue: second half of LoxP

Red: PSMACAR (partial)

63 **Fig. S7. Quantification of relative mRNA expression levels in tumors. (a)** The expression  
64 levels of CD3 and CAR mRNA in tumors with FUS stimulation (Fig. 4E, FUS+), with their  
65 values normalized to the corresponding mRNA levels in tumors without FUS stimulation (Fig.  
66 4e, FUS-). Dotted line: the corresponding mRNA levels in tumors without FUS stimulation are  
67 set to 1. **(b)** Schematics of the theoretical templates without (-Cre) or with (+Cre) Cre-lox  
68 recombination, and the expected products amplified by the designed primers. **(c)** Gel  
69 electrophoresis of the qPCR products of the tumors with FUS stimulation (FUS+) or without  
70 (FUS-). **(d)** Alignment of the combined Sanger sequencing results and the theoretical template  
71 with Cre-lox recombination.

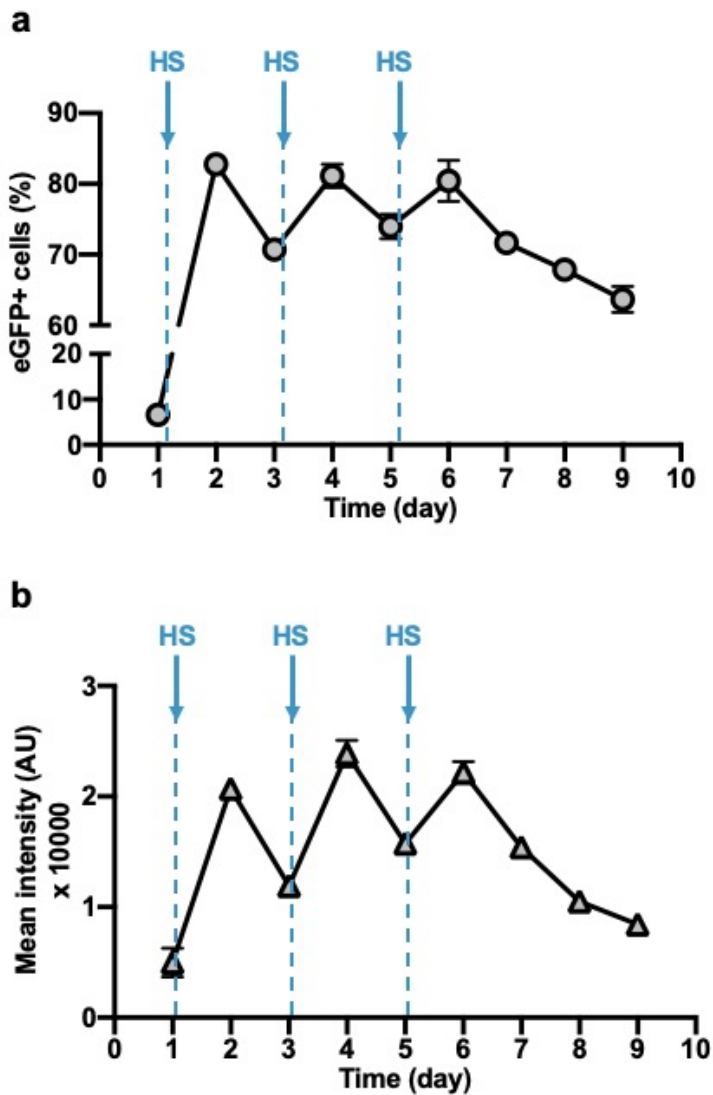

72

73 **Fig. S8. Gene activation with periodical HS.** (a-b) The dynamics of eGFP expression in terms  
 74 of (a) percentage of eGFP+ cells and (b) mean eGFP intensity in primary human T cells  
 75 transduced with the dual-promoter eGFP reporter and subjected to a 10-min HS every 48 hr on  
 76 Day 1, 3, and 5. N = 3; error bar: SEM.

| Plasmid                                     | Purpose                             | Used in                          | Source         |
|---------------------------------------------|-------------------------------------|----------------------------------|----------------|
| pHR-Hsp-eGFP-PGK-mCherry                    | inducible GFP reporter              | Figs. 1C-G, S1, S7               | This work      |
| pHR-PGK-LoxH-ZsGreen-STOP-LoxP-cMyc-CD19CAR | Lox recombination CD19CAR reporter  | Figs. 2B, 2D-I, 4B-C, S2         | This work      |
| pHR-Hsp-Cre-PGK-cMyc-LaG17                  | inducible Cre                       | Figs. 2B, 2D-I, 4B-C, S2, S5, S6 | This work      |
| pHR-Hsp-Fluc-PGK-Rluc-P2A-mCherry           | inducible dual luciferase reporter  | Fig. 3D, 3G-H                    | This work      |
| pHR-PGK-LoxH-ZsGreen-STOP-LoxP-cMyc-PSMACAR | Lox recombination PSMA CAR reporter | Figs. 4D-E, S5, S6               | This work      |
| pHR-PGK-PSMA                                | PSMA antigen                        | Figs. 4D-E, S5                   | This work      |
| pHIV-EF1a-Fluc-IRES-ZsGreen                 | firefly luciferase                  | Figs. 2G-I, 4B-E, S4, S5         | Addgene #39196 |

77

78

79 **Table S1. Plasmids used in this work.** Detailed information on the plasmids used in this work,

80 including the features of the constructs, their usage, and sources.

| Pattern | Step                | Temperature | Time   |
|---------|---------------------|-------------|--------|
| 1       |                     | 37°C        | ∞      |
| 2       | Initial equilibrium | 37°C        | 5 min  |
|         | 3 Cycles            | 43°C        | 5 min  |
|         |                     | 37°C        | 5 min  |
| 3       | Initial equilibrium | 37°C        | 5 min  |
|         | 1 Cycle             | 43°C        | 15 min |
| 4       | Initial equilibrium | 37°C        | 5 min  |
|         | 3 Cycles            | 43°C        | 10 min |
|         |                     | 37°C        | 10 min |
| 5       | Initial equilibrium | 37°C        | 5 min  |
|         | 1 Cycle             | 43°C        | 30 min |

81

82

83 **Table S2. Thermal cycler HS patterns used in this work.** The patterns of different HS

84 treatments performed in this work using a thermal cycler.

| Cell type | Gene delivery method          | Construct                             | Sorting    | Efficiency | Application                               |
|-----------|-------------------------------|---------------------------------------|------------|------------|-------------------------------------------|
| HEK 293T  | Lentivirus                    | Hsp-eGFP-PGK-mCherry                  | Not sorted | >99%       | Gene activation in vitro by HS            |
| Jurkat    | Lentivirus                    | Hsp-eGFP-PGK-mCherry                  | Not sorted | >99%       | Gene activation in vitro by HS            |
| Jurkat    | Lentivirus                    | Hsp-Cre-PGK-cMyc-LaG17                | Not sorted | 91.40%     | Cre activation in vitro by HS, CD69 assay |
|           | (co-transduction)             | PGK-LoxH-ZsGreen-STOP-LoxP-CD19CAR    | Not sorted | >99%       |                                           |
| Nalm-6    | Lentivirus                    | Hsp-Fluc-PGK-Rluc-mCherry             | FACS       | >99%       | Gene activation in vivo by FUS            |
| Nalm-6    | Gift from Michel Sadelain Lab | constitutive Fluc+                    | FACS       | >99%       | In vitro and in vivo cytotoxicity studies |
| PC3       | Lentivirus                    | pHIV-EF1a-Fluc-IRES-ZsGreen (Addgene) | FACS       | >99%       | In vitro and in vivo cytotoxicity studies |
|           | (co-transduction)             | PGK-PSMA                              | FACS       | >99%       |                                           |

85

86

87 **Table S3. Engineered cells used in this work.** Detailed information on the engineered cells

88 (excluding primary human T cells) used in this work, including the cell type, the transgene

89 delivered and the associated delivery method and efficiency, sorting information and

90 applications.

91

92 **Movie S1. The dynamics of HS-activated eGFP expression.** Real-time fluorescence imaging

93 of two HEK 293T cells transduced with the dual-promoter eGFP reporter (Hsp-eGFP-PGK-

94 mCherry). A 15-min HS at 43°C was applied from 30 to 45 min after the initiation of imaging

95 using a heating stage integrated with the microscope. Imaging lasted for 12 hours. GFP: GFP

96 channel showing the dynamic activation of eGFP; mCherry: mCherry channel showing the

97 constitutive mCherry expression.

98

99 **Movie S2. MRI-guided FUS stimulation on a targeted region on the hindlimb of an**

100 **anesthetized mouse.** MRI images are superimposed with color-coded temperature map of the

101 region of interest. FUS stimulation was aimed at the hindlimb of an anesthetized mouse. The

102 FUS stimulation is composed of a temperature rising phase (Dyn 1 - 10), a steady-state phase

103 (Dyn 11 - 75), and a cool-down phase (Dyn 76-90). Dyn: dynamic; one dynamic of MRI

104 scanning takes 4.6 sec.
